1 **Heterotypic inter-GPCR  $\beta$ -arrestin coupling regulates lymphatic endothelial junctional**  
2 **architecture in murine lymph nodes**

3

4

5 Yu Hisano<sup>1</sup>, Mari Kono<sup>2</sup>, Eric Engelbrecht<sup>1</sup>, Koki Kawakami<sup>3</sup>, Keisuke Yanagida<sup>1</sup>, Andreane  
6 Cartier<sup>1</sup>, Sylvain Galvani<sup>1</sup>, Andrew Kuo<sup>1</sup>, Yuki Ono<sup>3</sup>, Satoru Ishida<sup>3</sup>, Junken Aoki<sup>3</sup>, Richard L.  
7 Proia<sup>2</sup>, Asuka Inoue<sup>3</sup> and Timothy Hla<sup>1,\*</sup>

8

9 *<sup>1</sup>Vascular Biology Program, Boston Children's Hospital, Department of Surgery, Harvard*  
10 *Medical School, Boston, MA 02215, USA*

11 *<sup>2</sup>Genetics and Development Branch, NIDDK, NIH, Bethesda, MD*

12 *<sup>3</sup>Department of Pharmacology, Tohoku University, Sendai, Japan*

13

14 \*Correspondence should be addressed to [timothy.hla@childrens.harvard.edu](mailto:timothy.hla@childrens.harvard.edu)

15

16

17 **Abstract**

18           Lysophosphatidic acid (LPA) and sphingosine 1-phosphate (S1P) activate G protein-  
19 coupled receptors (GPCRs) to regulate key pathobiological processes. Here we report a novel  
20 lipid mediator GPCR cross-talk mechanism that modulates lymphatic endothelial junctional  
21 architecture in lymph nodes. LPAR1 was identified as an inducer of S1PR1/  $\beta$ -arrestin coupling  
22 from a genome-wide CRISPR/ Cas9 transcriptional activation screen. LPAR1 activation induced  
23 S1PR1  $\beta$ -arrestin recruitment while suppressing G $\alpha$ i protein signaling. Lymphatic endothelial  
24 cells from cortical and medullary sinuses of lymph nodes which express LPAR1 and S1PR1,  
25 exhibit porous junctional architecture and constitutive S1PR1 coupling to  $\beta$ -arrestin which was  
26 suppressed by the LPAR1 antagonist AM095. In endothelial cells, LPAR1-activation increased  
27 trans-endothelial permeability and junctional remodeling from zipper-like structures to puncta of  
28 adhesion plaques that terminate at actin-rich stress fibers with abundant intercellular gaps. Cross-  
29 talk between LPA and S1P receptors regulates complex junctional architecture of lymphatic sinus  
30 endothelial cells, a site of high lymphocyte traffic and lymph flow.

## 31 **Introduction**

32           Membrane phospholipids are rapidly metabolized by lipases and synthases to maintain the  
33 integrity of biological membranes (1). Lysophospholipids, which are metabolic intermediates,  
34 have unique geometry and biophysical properties that facilitate membrane topology, vesicle  
35 budding and fusion (2). However, lysophospholipids evolved as extracellular lipid mediators in  
36 vertebrates (3). The best characterized are lysophosphatidic acid (LPA) and sphingosine 1-  
37 phosphate (S1P), structurally-related lysophospholipids which were originally identified as major  
38 regulators of cellular cytoskeletal dynamics (4-6). LPA, which is synthesized in the extracellular  
39 environment by autotaxin-mediated hydrolysis of lysophosphatidyl choline, activates six G-  
40 protein-coupled receptors (GPCRs) in the EDG and purinergic subfamilies (7). S1P, on the other  
41 hand, is synthesized largely in the intracellular environment and secreted via specific transporters  
42 SPNS2 and MFSD2B (8-11). Extracellular chaperone-bound S1P activates five GPCRs in the  
43 EDG subfamily that are widely expressed (8).

44           Both LPA and S1P were originally identified as bioactive lipid mediators due to their  
45 ability to modulate cytoskeletal dynamics, neurite retraction, cell migration, cell proliferation, and  
46 intracellular ion changes (6). Such activity depends on the ability of LPA and S1P to regulate Rho  
47 family GTPases (12). After the discovery of the GPCRs for LPA and S1P, genetic loss of function  
48 studies in the mice have identified their essential roles in embryonic development and  
49 physiological processes of multiple organ systems (13). For example, both LPA and S1P signaling  
50 was shown to be important in early vascular development since mice that lack autotaxin (*Enpp2*)  
51 as well as sphingosine kinases (*Sphk1* and 2) were embryonic lethal at early stages of gestation  
52 (14-16). Similarly, compound S1P and LPA receptor knockouts also exhibit severe vascular  
53 development defects (17, 18). Similar studies have implicated the critical roles of S1P and LPA

54 signaling in neuronal and immune systems (19, 20). A key question that is raised by such findings  
55 is whether LPA and S1P are redundant in their biological functions. Data available so far suggest  
56 that while some redundant functions are mediated by both LPA and S1P, some unique functions  
57 do exist. For example, naïve T cell egress from secondary lymphoid organs is largely dependent  
58 on S1P signaling on lymphocyte S1PR1 (21) whereas both LPA and S1P induce fibrotic responses  
59 in the lung (22) as well as regulate cardiac development in zebrafish (23). Whether LPA and S1P  
60 signaling mechanisms regulate each other (i.e. crosstalk mechanisms) is not known.

61         The S1PR1 receptor is regulated by molecules that limit its cell surface residency; for  
62 example, CD69, GRK2, dynamin, and ApoM<sup>+</sup>-HDL (24-27). In this report, we searched for novel  
63 regulators of S1PR1 coupling to the  $\beta$ -arrestin pathway. Specifically, we used the TANGO system  
64 which uses TEV protease/  $\beta$ -arrestin fusion protein and S1PR1-TEV site-tetracycline  
65 transcriptional activator (tTA) as a readout (28). Coupled with the single guide (sg)RNA library-  
66 directed, CRISPR/ dCas9-induced endogenous genes (29), we screened for novel modulators of  
67 S1PR1. The top hit from this unbiased, whole-genome screen was LPAR1. We validated this  
68 interaction in a luciferase complementation system that quantifies GPCR coupling to  $\beta$ -arrestin.  
69 Our results suggest that LPAR1 interaction with S1PR1 attenuates S1P signaling in endothelial  
70 cells and modulates lymphatic sinus adherens junction and barrier function.

## 71 **Results**

### 72 *Unbiased, genome-wide search for S1PR1 modulators*

73 S1PR1 signaling can be readily monitored by ligand-activated  $\beta$ -arrestin coupling to the  
74 GPCR by the TANGO system, which leads to nuclear fluorescent protein expression (30). This  
75 system was shown to be sensitive to receptor activation in transfected cell lines and in the mouse.  
76 Since the receptor/  $\beta$ -arrestin coupling is faithfully registered and is cumulative due to the stability  
77 of the nuclear fluorescent protein, we adapted this system to U2OS osteosarcoma cells that are  
78 adaptable to high-throughput screening. Previous work has shown that direct activators of S1PR1,  
79 such as CD69 regulate receptor signaling and function (31). In order to search for other  
80 endogenous modulators of S1PR1 signaling, we turned to the synergistic activation mediator  
81 (SAM) system that uses CRISPR/ Cas9-based, sgRNA-dependent transcriptional activation of  
82 endogenous genes (32).

83 The SAM system turns on endogenous gene expression by sgRNA-dependent recruitment  
84 of multiple transcriptional activators (VP64, p65, and HSF1) at upstream of transcription start sites  
85 via MS2 bacteriophage coat proteins and mutated Cas9. This screening system was validated by  
86 the SAM sgRNA targeting *SPNS2*, an S1P transporter which functions at upstream of S1P  
87 receptors (33, 34). The designed *SPNS2* SAM sgRNA induced 180-fold increase in its mRNA  
88 expression and strongly activated the S1PR1-TANGO signal (Supplemental Figure 1).

89 To carry out unbiased search for S1PR1-signaling modulators, the SAM sgRNA library  
90 was introduced into S1PR1-TANGO system, in which  $\beta$ -arrestin2 coupling of S1PR1 can be  
91 monitored as nuclear expression of Venus fluorescent protein. Venus-positive cells (S1PR1/  $\beta$ -  
92 arrestin2 signaling positive) were sorted and expanded twice, genomic DNAs were purified and  
93 sequenced by Illumina next-gen sequencing (Figure 1A). Bioinformatic analysis indicated that

94 some SAM sgRNA sequences are highly enriched in the Venus-positive cells after sorting (Figure  
95 1B). The *LPAR1* gene was identified as one of the top hits from statistical analysis (Figure 1C).  
96 Top ten candidates were individually examined by specific SAM sgRNAs that were enriched after  
97 sorting Venus-positive cells. The SAM sgRNA specific for *LPAR1* induced its expression and  
98 turned on Venus expression, thus confirming the results from the genome-wide sgRNA screen that  
99 identified LPAR1 as an S1PR1 modulator (Supplemental Figure 2).

100

### 101 ***LPAR1* activation induces $\beta$ -arrestin recruitment to S1PR1**

102 To further investigate the mechanisms involved in the regulation of S1PR1 signaling by  
103 LPAR1, we used the NanoBiT system (35). This system is based on the structural  
104 complementation of NanoLuc luciferase and allows one to monitor the protein-protein interactions  
105 in real-time. NanoLuc luciferase is split into a small subunit (SmBiT; 11 amino acids) and a large  
106 subunit (LgBiT; 18kDa), that are fused with S1PR1 and  $\beta$ -arrestin1 with mutations in AP-2/  
107 Clathrin-binding motif (to reduce endocytosis), respectively (Figure 2A). S1P dose-dependently  
108 stimulated  $\beta$ -arrestin1 recruitment to S1PR1 in HEK293A cells transfected with S1PR1-SmBiT  
109 and LgBiT- $\beta$ -arrestin1 (Figure 2B). LPA treatment did not induce  $\beta$ -arrestin1 recruitment to  
110 S1PR1, consistent with the fact that LPA is not a high affinity ligand for S1PR1 (36, 37). However,  
111 in cells co-expressing LPAR1 and S1PR1-SmBiT, LPA treatment induced  $\beta$ -arrestin1 recruitment  
112 to S1PR1 with an EC<sub>50</sub> of  $\sim 10^{-7}$  M, which is a physiologically-relevant concentration of LPA  
113 (Figure 2C).

114 The effect of LPA was completely blocked by Ki16425, an LPAR1 antagonist(38),  
115 indicating that the  $\beta$ -arrestin1 coupling of S1PR1 is dependent on LPAR1 activation by the ligand  
116 (Figure 2D). W146, an S1PR1 antagonist, inhibited S1P-mediated  $\beta$ -arrestin1 recruitment to

117 S1PR1 but failed to inhibit LPA/ LPAR1-mediated  $\beta$ -arrestin1 coupling of S1PR1 (Figure 2D and  
118 E), suggesting that S1PR1 activation with S1P is not necessary for the LPA/ LPAR1-mediated  
119 mechanism to induce S1PR1 coupling to  $\beta$ -arrestin1. Furthermore, the S1PR1 ligand binding  
120 mutant (R120A) behaved similarly to the wild-type S1PR1 by allowing LPAR1 induced  $\beta$ -  
121 arrestin1 coupling (Figure 2B and F). These experiments confirm that LPAR1 activation induced  
122 inter-GPCR coupling of  $\beta$ -arrestin to S1PR1.

123

#### 124 ***G proteins are not required for LPA/ LPAR1-induced S1PR1/ $\beta$ -arrestin coupling***

125 LPAR1 couples to three families of G protein alpha subunits ( $G\alpha_i$ ,  $G\alpha_{12/13}$ , and  $G\alpha_q/11$ )  
126 while S1PR1 is a  $G\alpha_i$ -coupled receptor (39-42). To examine whether LPAR1-induced inter-GPCR  
127 coupling of  $\beta$ -arrestin1 to S1PR1 requires heterotrimeric G proteins, we used HEK293 cells  
128 lacking *GNAS*, *GNAL*, *GNAQ*, *GNAI1*, *GNAI2*, *GNAI3*, *GNAII*, *GNAI2*, *GNAI3*, *GNAOI*, *GNAZ*,  
129 *GNATI*, and *GNAT2* (full $\Delta G\alpha$ ) generated with CRISPR/ Cas9 system (Supplemental Figure 3 and  
130 4). Even in the HEK293 full $\Delta G\alpha$  cells, S1P activation of S1PR1 induced  $\beta$ -arrestin1 coupling at  
131 the same degree with wild-type cells, suggesting that GPCR/  $\beta$ -arrestin1 coupling is G protein  
132 independent (Figure 2B and 3A), a finding which was reported previously (43). We observed that  
133 LPA stimulation of LPAR1 induced S1PR1/  $\beta$ -arrestin1 coupling in the HEK293 full $\Delta G\alpha$  cells  
134 (Figure 3B), indicating that heterotrimeric G protein coupling is not required for inter-GPCR  $\beta$ -  
135 arrestin coupling.

136

#### 137 ***LPAR1 C-terminal is necessary for the $\beta$ -arrestin coupling of S1PR1***

138  $\beta$ -arrestin primarily interacts with intracellular C-terminal tail region of GPCRs even  
139 though the 3<sup>rd</sup> intracellular loop may also be involved (44). Deletion of the C-terminal domain in

140 the LPAR1 $\Delta$ C mutant lost the ability to recruit  $\beta$ -arrestin1 in response to LPA (Figure 4A) which  
141 was demonstrated using the LPAR1 $\Delta$ C-SmBiT and LgBiT- $\beta$ -arrestin1 constructs. Both LPAR1  
142 and LPAR1 $\Delta$ C mutants couple to the heterotrimeric G $\alpha$ i protein in an equivalent manner, which  
143 was assessed as dissociation of heteromeric G proteins using LgBiT-GNAI2/ SmBiT-GNG (Figure  
144 4B). However, LPAR1 $\Delta$ C mutant was unable to induce  $\beta$ -arrestin1 recruitment to S1PR1 in  
145 response to LPA (Figure 4C). This result suggests that initial  $\beta$ -arrestin1 recruitment to LPAR1 is  
146 required for the LPA-mediated inter-GPCR coupling of  $\beta$ -arrestin to S1PR1.

147

#### 148 ***Transmembrane helix 4 of S1PR1 is important for the $\beta$ -arrestin coupling of S1PR1***

149 We next examined the hypothesis that direct interactions between S1PR1 and LPAR1 is  
150 needed for inter-GPCR  $\beta$ -arrestin coupling. The transmembrane helix 4 of S1PR1 was reported to  
151 interact directly with CD69, a transmembrane C-type lectin (24). The S1PR1(TM4) mutant in  
152 which transmembrane helix 4 is replaced with that of S1PR3 decreased the association with CD69,  
153 suggesting that it is the domain involved in intermolecular association with GPCR modulators.  
154 We therefore, examined the role of the transmembrane helix 4 of S1PR1 in LPAR1-mediated inter-  
155 GPCR  $\beta$ -arrestin coupling to S1PR1. S1PR1(TM4)-SmBiT can be expressed at same level as  
156 S1PR1-SmBiT (Supplemental Figure 5) and maintains the ability to recruit  $\beta$ -arrestin1 by S1P  
157 stimulation (Figure 4D). However, the LPAR1-mediated  $\beta$ -arrestin1 coupling of S1PR1(TM4)  
158 was significantly attenuated (Figure 4E), indicating that the transmembrane helix 4 of S1PR1 is  
159 important for the LPAR1-mediated  $\beta$ -arrestin1 coupling of S1PR1.

160

#### 161 ***LPAR1-induced inter-GPCR $\beta$ -arrestin coupling attenuates S1PR1/ Gi signaling***



162 In many GPCRs,  $\beta$ -arrestin recruitment is an initial trigger for receptor internalization by  
163 facilitating interaction with AP-2 and clathrin, that help recruit the GPCRs to the endocytic  
164 machinery (45). S1PR1 tagged with Flag at extracellular N-terminal was expressed in HEK293A  
165 cells with LPAR1 and Flag-S1PR1 cell surface expression was analyzed by flow cytometry.  
166 Surprisingly, Flag-S1PR1 surface expression was not changed by LPA stimulation while S1P  
167 stimulation induced Flag-S1PR1 internalization (Figure 5A). Immunofluorescence analysis  
168 confirmed these conclusions (Supplemental Figure 6). These results suggest that while LPAR1-  
169 induced inter-GPCR  $\beta$ -arrestin coupling to S1PR1, this event in and of itself is not sufficient to  
170 induce S1PR1 endocytosis.

171 Next, we examined whether LPAR1 activation modulates the S1PR1 signal transduction.  
172 Coupling of S1PR1 to the heterotrimeric G protein pathway was assessed using LgBiT-GNAO1/  
173 SmBiT-GNG and AUY954, an S1PR1 selective agonist (46). AUY954 induced S1PR1-mediated  
174 heteromeric G protein dissociation in a dose dependent manner, and that was significantly  
175 suppressed by co-expression with LPAR1 (Figure 5B). Other LPA receptors (LPAR2 and LPAR5)  
176 expressed at similar levels as LPAR1 failed to suppress S1PR1-mediated  $G\alpha_i$  protein activation  
177 (Figure 5B and C). These results indicate that LPAR1 specifically induces inter-GPCR  $\beta$ -arrestin  
178 coupling to suppress S1PR1 heterotrimeric  $G\alpha_i$  protein signaling pathway without inducing  
179 receptor endocytosis.

180

### 181 ***Endogenous LPAR1 stimulates S1PR1/ $\beta$ -arrestin coupling in vivo at lymphatic sinuses***

182 Next, to examine whether endogenously-expressed LPAR1 induces inter-GPCR  $\beta$ -arrestin  
183 coupling to S1PR1, we isolated mouse embryonic fibroblast (MEF) cells from S1PR1 luciferase  
184 signaling mice, in which endogenous S1PR1/ $\beta$ -arrestin2 coupling can be monitored via the firefly

185 split luciferase fragment complementation system (47). As shown in Figure 6A, LPA induced the  
186 S1PR1/  $\beta$ -arrestin2 coupling in a dose dependent manner, that was blocked by Ki16425, indicating  
187 that the activation of endogenously-expressed LPAR1 induces inter-GPCR  $\beta$ -arrestin coupling to  
188 S1PR1.

189 S1PR1 luciferase signaling mice were used to determine if LPAR1-induced inter-GPCR  $\beta$ -  
190 arrestin coupling to S1PR1 occurs *in vivo*. As previously observed, significant S1PR1 coupling to  
191  $\beta$ -arrestin is seen in several organs in normal mice under homeostatic conditions (47) and (Figure  
192 6C). AM095, an orally available LPAR1 selective antagonist with desirable *in vivo*  
193 pharmacokinetic features (48), completely blocked LPA/ LPAR1-mediated  $\beta$ -arrestin1 coupling  
194 of S1PR1 *in vitro* (Figure 6B). Administration of AM095 to S1PR1 luciferase signaling mice  
195 significantly decreased bioluminescence signals (Figure 6C–E). Detailed imaging of dissected  
196 mice showed that S1PR1 coupling to  $\beta$ -arrestin in lung, spleen, and lymph nodes were all  
197 significantly attenuated by AM095 treatment (Figure 6F–H).

198 Since lymphatic endothelial cells express both LPAR1 and S1PR1 (49), we further  
199 examined the *in vivo* relevance of LPAR1-induced inter-GPCR  $\beta$ -arrestin coupling to S1PR1 in  
200 murine lymph nodes under homeostatic conditions. For this, we used S1PR1-GFP signaling mouse  
201 which records cumulative S1PR1 coupling to  $\beta$ -arrestin while allowing high resolution imaging  
202 studies (30). Immunofluorescence and confocal microscopy of brachial lymph node sections in  
203 adult mice showed strong S1PR1 coupling to  $\beta$ -arrestin in lymphatic endothelial cells that make  
204 up cortical, medullary, and subcapsular sinuses (Figure 7A). As previously reported (30), high  
205 endothelial venules (HEV) also exhibit S1PR1 coupling to  $\beta$ -arrestin (Supplemental Figure 7).  
206 When mice were treated with the LPAR1 inhibitor AM095 for 5 days, S1PR1-GFP signal in  
207 subcapsular sinuses and HEV were not altered (Figure 7B,C, and Supplemental Figure 7). In

208 contrast, S1PR1-GFP signal inside the lymph nodes, which are mostly from lymphatic endothelial  
209 cells of cortical and medullary sinuses, were suppressed (Figure 7D and E). These data are  
210 consistent with quantitative imaging data using S1PR1 luciferase signaling mice shown above and  
211 strongly suggest that the site of LPAR1-induced inter-GPCR  $\beta$ -arrestin coupling to S1PR1 is at  
212 the lymphatic endothelial cells of inter-lymphatic sinuses *in vivo*. High resolution images of cell-  
213 cell junctions in sinus lining endothelial cells of lymph nodes is shown in Figure 7F. The junctional  
214 structure is complex and contains both continuous and punctate VE-cadherin and PECAM-1  
215 positive structures.

216

### 217 ***LPAR1 activation suppresses endothelial barrier function and junctional architecture***

218 Lymphatic endothelial cells of sinuses in lymph nodes exhibit complex junctional  
219 architecture consisting of button-like structures and high permeability of lymph flow, which are  
220 thought to be important for efficient lymphocyte egress and lymphatic fluid drainage and flow (50,  
221 51). Further, endothelial S1PR1 regulates vascular barrier function by activating Gai/ Rac GTPase  
222 signaling pathway that stimulates VE-cadherin assembly at adherens junctions (52). To examine  
223 whether LPAR1 modulates S1PR1-dependent barrier function in endothelial cells, LPAR1 was  
224 expressed in HUVEC using an inducible system (Supplemental Figure 8) and the barrier function  
225 was quantified by measuring trans-endothelial electrical resistance (TEER) (53). As expected,  
226 S1PR1 agonist AUY954 induced sustained increase in vascular barrier function (Figure 8A). LPA  
227 itself did not influence barrier function either in the presence or absence of AUY954 (Figure 8A).  
228 However, in HUVEC expressing LPAR1, LPA-induced a small and transient increase in barrier  
229 function (Figure 8C). In sharp contrast, LPA inhibited AUY954-induced vascular barrier increase  
230 significantly (Figure 8C). This was completely reversed by Ki16425, an antagonist of LPAR1

231 (Figure 8D). These data suggest that LPAR1 induces inter-GPCR  $\beta$ -arrestin coupling to attenuate  
232 S1PR1-induced barrier function and thereby enhance the porosity of the endothelial monolayer.

233 In order to determine the cellular changes induced by LPAR1 and S1PR1 inter-GPCR  $\beta$ -  
234 arrestin coupling, we examined the status of VE-cadherin, a major junctional protein. F-actin and  
235 p-MLC (phospho-myosin light chain) were also examined to determine the role of Rho-coupled  
236 actin/ myosin architecture which is known to be downstream of LPAR1 (54). As anticipated,  
237 S1PR1 activation by AUY954 strongly induced junctional VE-cadherin (Figure 8E and F). In  
238 S1PR1 activated HUVEC, minimal intercellular gaps were observed and VE-cadherin appeared as  
239 continuous, zipper-like structures at cell-cell borders (Figure 8F). Cortical F-actin was induced  
240 and p-MLC staining was attenuated, suggesting increase in Rac GTPase and decrease in Rho  
241 GTPase activity, respectively (Figure 8E and F). LPA treatment strongly induced intercellular  
242 gaps which punctuate continuous VE-cadherin staining, strong F-actin staining and stress fibers  
243 and marked increase in p-MLC staining (Figure 8G). In the presence of both LPA and AUY954,  
244 junctional architecture was modulated to contain a hybrid of continuous cell-cell border staining  
245 interspersed with punctate VE-cadherin localization at the termini of actin stress fibers (Figure  
246 8H). p-MLC and F-actin at stress fibers was slightly attenuated (Figure 8G and H). However,  
247 intercellular gaps were induced when compared with S1PR1 activated HUVEC (Figure 8F and H).  
248 These results suggest that the LPAR1 activation induces inter-GPCR  $\beta$ -arrestin coupling to S1PR1  
249 which modulates Rho GTPase-coupled signal transduction pathways to allow complex cell-cell  
250 adherens junction architecture and decreased vascular barrier function. Similar cellular  
251 mechanisms may occur in lymphatic endothelial sinuses to regulate high lymphocyte traffic and  
252 efficient lymphatic fluid flow.

253

## 254 **DISCUSSION**

255           A major finding of this study is that LPAR1 directly regulates S1PR1 function. This  
256 constitutes a heretofore undescribed cross-talk mechanism between LPA and S1P, two  
257 lysophospholipids which acquired extracellular functions as vertebrates evolved (3). As  
258 vertebrates acquired closed vascular systems, immune cells which are now faced with the  
259 challenge of navigating in and out of the circulatory system used S1P, an abundant circulatory  
260 lipid mediator with defined spatial gradients for lymphocyte trafficking (21). Our present results  
261 suggest that LPA signaling modulates S1PR1 signaling in specific contexts. The S1PR1 receptor  
262 is expressed abundantly in endothelial cells and its cell surface expression is controlled by multiple  
263 processes (55). For example, the lymphocyte activation-induced molecule CD69 directly interacts  
264 with S1PR1 to induce its ligand-dependent endocytosis, a process that decides whether  
265 lymphocytes egress occurs or not (24, 31). Indeed, tissue residency of various T cells is controlled  
266 by CD69 (31). In endothelial cells, cell surface signaling of S1PR1 regulates vascular barrier  
267 function (52, 56). Thus, our finding that LPAR1 modulates S1PR1 directly suggests functional  
268 cross-talk between LPA and S1P.

269           Our study also provides a method to discover novel regulators of GPCR signaling. By  
270 adapting a receptor reporter that induces GFP expression downstream of GPCR/  $\beta$ -arrestin-  
271 coupling with a whole genome-wide CRISPR/ Cas9-dependent transcriptional activation system,  
272 we identified LPAR1 as a regulator of S1PR1 function. This system could be adapted to other  
273 GPCRs or signaling pathways. Given the modularity and flexibility of CRISPR/ Cas9 system  
274 which can both activate or repress genes (29), we suggest that many novel signaling proteins that  
275 modulate GPCRs could be identified using similar screens.

276 We also describe in detail, mechanistic insight into interactions between S1PR1 and  
277 LPAR1. S1PR1 and LPAR1 interaction requires the TM4 domain of S1PR1, which was  
278 previously identified to be critical for direct interaction with CD69, an event critical for  
279 lymphocyte egress (31). Activated LPAR1 recruits  $\beta$ -arrestin which is then transferred to S1PR1,  
280 a phenomenon that we refer to as inter-GPCR  $\beta$ -arrestin coupling. Recent structural studies  
281 indicate that both the C-terminal tail and the 3<sup>rd</sup> intracellular loop of GPCRs are involved in direct  
282 interaction with  $\beta$ -arrestin (44). Since the 3<sup>rd</sup> intracellular loop of S1PR1 interacts directly with  
283  $G_{\alpha i}$  family of heterotrimeric G proteins (57), inter-GPCR  $\beta$ -arrestin signaling resulted in  
284 attenuation of S1PR1/  $G_{\alpha i}$  signaling. However, this mechanism is not sufficient to induce S1PR1  
285 endocytosis. Thus, we suggest that LPAR1-induced inter-GPCR  $\beta$ -arrestin coupling results in  
286 suppression of signaling by plasma membrane-localized S1PR1. This may allow rapid reversal of  
287 S1PR1 inhibitory activity and thus may allow acute regulatory mechanism for S1PR1 GPCR.

288 A key issue we addressed in this study is whether this phenomenon occurs *in vivo*. For  
289 this, we turned to the recently-developed real-time S1PR1 luciferase signaling reporter mice,  
290 which induces luciferase activity upon S1PR1/  $\beta$ -arrestin coupling (47). Our data show that  
291 constitutive luciferase signal in the several organs of adult S1PR1 luciferase signaling reporter  
292 mice is LPAR1-dependent. In particular, cervical and mesenteric lymph nodes showed strong  
293 luciferase activity that was suppressed by LPAR1 antagonist AM095. High resolution confocal  
294 microscopy studies show that sinus lining lymphatic endothelial cells in cortical and medullary  
295 sinuses of lymph nodes are the cells in which inter-GPCR  $\beta$ -arrestin coupling between LPAR1 and  
296 S1PR1 occurs. Such structures are the sites at which many lymphocytes egress from the lymph  
297 node parenchyma into the lumen of the sinuses (50, 51). In addition, lymph from afferent  
298 lymphatics that permeate through the lymph node parenchyma flow through these sinus walls to

299 ultimately drain from the efferent lymphatic vessels. We suggest that inter-GPCR  $\beta$ -arrestin  
300 coupling between LPAR1 and S1PR1 regulates the specialized properties of lymph node sinus  
301 lining endothelial cells.

302 It is noteworthy that S1P-dependent lymphocyte egress occurs at cortical and medullary  
303 sinuses (58). S1P that is enriched in lymph that is secreted from lymphatic endothelial cells via  
304 SPNS2-dependent processes (59, 60), together with low S1P in the lymphatic parenchymal spaces,  
305 provides the spatial S1P gradient needed for efficient lymphocyte egress (21). Cell surface S1PR1  
306 on lymphocytes detect this gradient for a spatial cue for the egress process which involves traverse  
307 of the lymphocyte through the sinus lining endothelial cells (61). Once the lymphocytes have  
308 entered the lumen of the cortical and medullary sinuses, ensuing lymph flow help drain them into  
309 efferent lymphatic vessels (58), thus ensuring efficient lymphocyte trafficking. Our results suggest  
310 that LPAR1-dependent inter-GPCR  $\beta$ -arrestin coupling keeps the lymphatic endothelial cell  
311 S1PR1 in an inactive state, which may be critical for homeostatic lymphocyte egress. It is  
312 noteworthy that LPA is generated in the lymphoid tissue parenchyma (62) and regulate lymphocyte  
313 motility and traffic within the lymph node (20, 63).

314 We addressed the role of LPAR1-induced inter-GPCR  $\beta$ -arrestin coupling in endothelial  
315 cell adherens junctions and barrier function. Our results show that this mechanism alters the  
316 junctional architecture and decreases the endothelial barrier function. Specifically, junctions were  
317 remodeled from continuous structures at cell-cell borders to punctate structures at the termini of  
318 actin-rich stress fibers. This results in the formation of abundant intercellular gaps which explains  
319 decreased vascular barrier function. Increased LPAR1-induced Rho GTPase pathways and  
320 decreased S1PR1-induced Rac GTPase pathways are likely involved, as determined by the analysis  
321 of downstream targets p-MLC and F-actin at the cell cortex and stress fibers, respectively (54, 64).

322 We propose that junctional remodeling provides a mechanism for high permeability seen in sinus  
323 lining lymphatic endothelial cells of lymph nodes. Previous studies in lymphatic endothelial cell  
324 junctions have described the presence of button-like junctions which are actively maintained in  
325 lymph nodes (51) and in lymphatic capillaries of the small intestinal villi (65). Indeed, this  
326 property may allow lymph fluid flow and efficient lymphocyte egress under physiological  
327 conditions.

328 In summary, we have described a mechanism via which LPAR1 suppresses cell surface  
329 S1PR1/  $G_{\alpha i}$  signaling by inter-GPCR  $\beta$ -arrestin coupling. This process regulates lymphatic  
330 endothelial cell junctional architecture and barrier function at sinus lining endothelial cells under  
331 physiological conditions. Cross-talk between LPA and S1P receptors regulates complex functions  
332 of circulatory and immune systems. Pharmacologic modulation of this pathway may be useful in  
333 lymphatic and immune disorders.



## 334 **Materials and methods**

### 335 **Reagents**

336 Primary antibodies used in this study include the following: PE rat monoclonal anti-Flag  
337 tag (L5), Alexa Fluor 647 mouse monoclonal anti-HA (16B12), Alexa Fluor 647 rat monoclonal  
338 CD8a (53-6.7), Alexa Fluor 647 rat monoclonal CD169 (3D6.112), Alexa Fluor 594 rat  
339 monoclonal B220 (RA3-6B2), Alexa Fluore 647 Armenian hamster monoclonal CD11c (N418)  
340 (BioLegend); Rabbit polyclonal anti-S1PR1 (H60), mouse monoclonal anti-VE-cadherin (F-8)  
341 (Santa Cruz Biotechnology); Rabbit polyclonal anti-phospho-myosin light chain 2 (Cell Signaling  
342 Technology); Biotin-conjugated rat monoclonal anti-LYVE1 (ALY7) (eBioscience); Goat  
343 polyclonal anti-VEGFR3, Goat polyclonal anti-VE-cadherin (R&D Systems); Rat monoclonal  
344 anti-PECAM-1 (MEC13.3) (BD Pharmingen); Rabbit monoclonal anti-ERG (EPR3864) (Abcam).  
345 The secondary antibody used for western blotting was HRP-conjugated goat anti-rabbit IgG  
346 (Jackson Immuno Research). The secondary antibodies used for immunofluorescence were Alexa  
347 Fluor 405 donkey anti-goat IgG (Abcam), Alexa Fluor 647 donkey anti-mouse and anti-goat IgG  
348 (Invitrogen), Alexa Fluor 488 goat anti-rabbit IgG (Invitrogen), DyLight 550 donkey anti-rat IgG  
349 (Invitrogen), and DyLight 405 donkey anti-rabbit IgG (Jackson Immuno Research). Alexa Fluor  
350 405 streptavidin and Alexa Fluor 546 Phalloidin were from Invitrogen. S1P and LPA were from  
351 Avanti Polar Lipids. Ki16425 and AM095 were from Sigma. W146 was from Cayman. AUY954  
352 was from Cellagen Technology.

353

### 354 **Cell culture**

355 HEK293A, HEK293T, and mouse embryonic fibroblast (MEF) cells were cultured in  
356 Dulbecco's modified Eagle's (DMEM) with L-glutamine, high glucose, and sodium pyruvate

357 medium (Corning) supplemented with 10% fetal bovine serum (FBS) and penicillin-streptomycin  
358 (Corning) in a 37 °C incubator with 5% CO<sub>2</sub>. U2OS cells were cultured in McCoy's 5A medium  
359 (Corning) supplemented with 10% FBS and 1% penicillin-streptomycin in a 37 °C incubator with  
360 5% CO<sub>2</sub>. HUVECs were cultured in EGM-2 medium (Lonza) supplemented with 10% FBS or  
361 M199 medium (Corning) supplemented with 10% FBS, penicillin-streptomycin, endothelial cell  
362 growth factor from sheep brain extract, and 5 units/ml heparin on human fibronectin-coated dishes  
363 in a 37 °C incubator with 5% CO<sub>2</sub>.

364

### 365 **Generation of U2OS cell line for library screening**

366 The U2OS cells transduced with dCas9-VP64 (a gift from Feng Zhang, Addgene #61425)  
367 and MS2-P65-HSF (a gift from Feng Zhang, Addgene #61426) (32) were selected with 6 µg/mL  
368 Blasticidin (Gibco) and 200 µg/mL Hygromycin (Gibco), respectively. For S1PR1-TANGO  
369 system, mouse S1pr1 linked to tTA via a TEV protease cleavage site and mouse β-arrestin 2 linked  
370 to TEV protease were designed to be cloned in a single vector using a bicistronic internal ribosome  
371 entry site (IRES) as described previously (30), and the PCR amplicon from this vector was cloned  
372 into pCDH-CMV-MCS-EF1α-Neo lentivector (System Biosciences) with Nhe I and Not I  
373 digestion sites. The nuclear localization signal (NLS)-Venus (a gift from Karel Svoboda, Addgene  
374 #15753 (66)) with PEST degradation sequence at C-terminal was cloned into downstream of TRE  
375 site on pLVX-TetOn lentivector (Clontech). 600 µg/mL Geneticin (G418, Gibco) and 1 µg/mL  
376 Puromycin (Gibco) were used for selecting the cells transduced with these constructs.

377 To produce lentiviral particles, HEK293T cells were seeded on 10 cm dishes 1 day before  
378 transfection. On the following day when they had reached 80–90% confluency, medium was  
379 replaced by fresh 10% FBS/DMEM medium one hour prior to transfection. 20 µg of lentiviral

380 plasmid, 12.6  $\mu\text{g}$  of pMDL/pRRE, 9.6  $\mu\text{g}$  of pVSV-G, and 6  $\mu\text{g}$  of pRSV-REV were diluted with  
381 water and mixed with 85.25  $\mu\text{l}$  of 2M  $\text{CaCl}_2$  solution, then 688  $\mu\text{l}$  of  $2 \times$  HBS solution (274 mM  
382 NaCl, 1.5 mM  $\text{Na}_2\text{HPO}_4 \cdot 7\text{H}_2\text{O}$ , 55 mM HEPES, pH 7.0) was slowly added into the plasmids  
383 solution while vortex. After incubation at room temperature for 20 min, the solution mixture was  
384 added drop-wise directly to cells. Medium was replaced by 10% FBS/McCoy's 5A medium 12–  
385 16 hr after transfection. Lentiviral particle-containing supernatant was harvested at 2 days after  
386 the medium change, and filtered with a 0.45  $\mu\text{m}$  syringe filter (Corning). PEG-it Virus  
387 Precipitation Solution (System Biosciences) was used when concentration was needed. U2OS  
388 cells were seeded 1 day before infection. On the following day when they had reached 20–30%  
389 confluency, medium was replaced by 10% FBS/McCoy's 5A medium containing lentiviral  
390 particles. Medium was renewed 1 day after infection and antibiotics were added on the following  
391 day. The single clones were isolated from antibiotics resistant cells by limiting dilution, then  
392 introduced with the SAM sgRNA library (a gift from Feng Zhang, Addgene #1000000057) at a  
393 low multiplicity of infection.

394

### 395 **Library screening and sgRNA sequence analysis**

396 The U2OS cells transduced with the SAM sgRNA library were cultured in 400  $\mu\text{g}/\text{ml}$   
397 Zeocin (Gibco) to select cells harboring SAM sgRNAs. The Zeocin-resistant cells were allowed  
398 to grow (pre-sort cells) or starved with 0.5% charcoal-treated FBS for 2 days. Then, starved cells  
399 were harvested and Venus-positive cells were sorted by FACS (post-sort cells) as shown in Figure  
400 1A. The sorted cells were seeded and expanded to repeat sorting. After second expansion,  
401 genomic DNAs were harvested from  $10 \times 10^7$  pre- and post-sort cells using the Quick-gDNA  
402 MidiPrep (Zymo Research) according to the manufacturer's protocol. Amplification and

403 purification of genomic DNAs for NGS analysis was performed as described previously (67).  
404 After quality control with Agilent 2200 TapeStation, libraries were subjected to single-end  
405 sequencing on an Illumina NextSeq to generate at least 50 million reads for both pre-sort and post-  
406 sort cells. Reads were assigned to target genes using the previously described Python script  
407 “count\_spacers.py” with default parameters (67). The resultant count table was used as input for  
408 the script “mageck” to generate significance scores for each target gene (68).

409

#### 410 **RNA isolation and quantitative real-time RT-PCR**

411 Total RNA was isolated using TRI reagent (Zymo Research) and further purified by Direct-  
412 zol RNA MicroPrep kit (Zymo Research) and treated with DNase (30 U/ $\mu$ g total RNA, QIAGEN)  
413 then reverse transcribed using qScript XLT cDNA SuperMix (Quanta Bioscience). Expression of  
414 mRNA was quantitated by using PerfeCTa SYBR Green FastMix Reaction Mixes (Quanta  
415 Bioscience) and StepOnePlus Real-Time PCR System (Applied Biosystems) with cDNA  
416 equivalent to 7.5 ng of total RNA.

417 Primers used for RT-PCR include the following (5'-3'):

418 *HPRT*-Fw; TGACACTGGCAAAACAATGCA

419 *HPRT*-Rv; GGTCCTTTTCACCAGCAAGCT

420 *SPNS2*-Fw; AACGTGCTCAACTACCTGGAC

421 *SPNS2*-Rv; ATGAACACTGACTGCAGCAG

422 *LPARI*-Fw; ACTGTGGTCATTGTGCTTGG

423 *LPARI*-Rv; ACAGCACACGTCTAGAAGTAAC

424 *FAM156A*-Fw; TATGCTGTTGGGAGGGAAGC

425 *FAM156A*-Rv; GCAGTATCGACATTCACATCGG

426

#### 427 **NanoBiT assay**

428 HEK293A cells were seeded at a density of  $8 \times 10^8$  cells/6 cm dish 1 day before transfection.

429 On the following day, expression vectors and polyethylenimine (PEI, Polysciences, Inc., pH 7.0)

430 were diluted in 200  $\mu$ l of Opti-MEM (Gibco), respectively. 300 ng of LgBiT- $\beta$ -arrestin1(EE) and

431 600 ng of GPCR-SmBiT expression vectors were used for  $\beta$ -arrestin recruitment assay, and 200

432 ng of LgBiT-GNA, 1000 ng of GNB1, 1000 ng of SmBiT-GNGT1, and 400 ng of GPCR

433 expression vectors were used for G proteins dissociation assay. 10  $\mu$ l of 1 mg/ml PEI was

434 incubated in Opti-MEM for 5 min at room temperature, then diluted vectors and PEI were

435 combined and mixed with vortex, then incubated for 20 min at room temperature. After incubation,

436 the solution mixture was added drop-wise directly to cells. On the following day, transfected cell

437 were detached with 0.5 mM EDTA/PBS. After centrifugation at 190g for 5 min, cells were

438 suspended in 4 ml of 0.01% fatty acid free BSA (Sigma)/HBSS (Corning) supplemented with 5

439 mM HEPES (Corning) and seeded on a white 96 well plate at 80  $\mu$ l/well. 20  $\mu$ l of 50  $\mu$ M

440 Coelenterazine (Cayman) was added and incubated for 2 hr at room temperature in dark. Initial

441 luminescence was measured as baseline using SpectraMax L (Molecular Devices), then cells were

442 stimulated with ligands and incubated at room temperature. Luminescence after stimulation was

443 measured and normalized with initial reads. Development and validation of the NanoBiT-G

444 protein dissociation assay is described elsewhere (69).

445

#### 446 **Split firefly luciferase complementation assay in MEFs**

447 MEFs isolated from S1PR1 luciferase signaling mice (47) were seed on a white 96 well

448 plate. On the following day, medium was replaced by 80  $\mu$ l of 0.01% fatty acid free BSA/HBSS

449 supplemented with 5 mM HEPES and incubated for 2 hr at room temperature. 20  $\mu$ l of 40 mg/mL  
450 Luciferin (Perkin Elmer) was added and initial luminescence was measured. After stimulation  
451 with LPA, luminescence was measured and normalized with initial reads. Bioluminescence in live  
452 mice and internal organs was measured as described previously (47).

453

#### 454 **Generation of G protein alpha subunit-depleted HEK293 cells by CRISPR/ Cas9 system**

455 G protein alpha subunit-depleted HEK293 cells were generated by mutating genes  
456 encoding members of the *Gai* family from previously established HEK293 cells devoid of three  
457 *G $\alpha$*  families (the *G $\alpha$ s*, the *G $\alpha$ q*, and the *G $\alpha$ 12* families) (43), using CRISPR/ Cas9 system as  
458 described previously (70, 71) with minor modifications. sgRNA constructs targeting the *GNAI1*,  
459 the *GNAI2*, the *GNAI3*, the *GNAO1*, the *GNAT1*, the *GNAT2*, and the *GNAZ* genes, whose mRNA  
460 were expressed in HEK293 cells (72), were designed by a CRISPR design tool  
461 (<http://crispr.mit.edu>) so that a SpCas9-mediated DNA cleavage site (three base pairs upstream of  
462 the PAM sequence (NGG)) encompasses a restriction enzyme-recognizing site. Designed sgRNA-  
463 targeting sequences including the SpCas9 PAM sequences were as following: 5'-  
464 CTTTGGTGACTCAGCCCGGGCGG-3' (*GNAI1*; hereafter, restriction enzyme-site (Sma I in  
465 this case) is underlined and the PAM sequence is in bold), 5'-  
466 CGTAAAGACCACGGGGGATCGTGG-3' (*GNAI2*; Mbo I), 5'-  
467 AGCTTGCTTCAGCAGATCCAGGG-3' (*GNAI3*; Mbo I), 5'-  
468 AATCGCCTTGCTCCGCTCGAGGG-3' (*GNAO1*; Xho I), 5'-  
469 TTTCAGGTGCCGGTGAGTCCGGG-3' (*GNAT1*; Hinf I), 5'-  
470 AACCATGCCTCCTGAGCTCGTGG-3' (*GNAT2*; Sac I) and 5'-  
471 GATGCGGGTCAGCGAGTCGATGG-3' (*GNAZ*; Hinf I). The designed sgRNA-targeting

472 sequences were inserted into the Bbs I site of the pSpCas9(BB)-2A-GFP (PX458) vector (a gift  
473 from Feng Zhang, Addgene plasmid #42230) using a set of synthesized oligonucleotides as  
474 following: 5'-CACCGCTTTGGTGACTCAGCCCGGG-3' and 5'-  
475 AAACCCCGGGCTGAGTCACCAAAGC-3' (*GNAII*; note that a guanine nucleotide (G) was  
476 introduced at the -21 position of the sgRNA (underlined), which enhances transcription of the  
477 sgRNA); 5'-CACCGCGTAAAGACCACGGGGATCG-3' and 5'-  
478 AAACCGATCCCCGTGGTCTTTACGC-3' (*GNAI2*); 5'-  
479 CACCGAGCTTGCTTCAGCAGATCCA-3' and 5'-AAACTGGATCTGCTGAAGCAAGCTC-  
480 3' (*GNAI3*); 5'-CACCGAATCGCCTTGCTCCGCTCGA-3' and 5'-  
481 AAACTCGAGCGGAGCAAGGCGATTC-3' (*GNAOI*); 5'-  
482 CACCGTTTCAGGTGCCGGTGAGTCC-3' and 5'-AAACGGACTCACCGGCACCTGAAAC-  
483 3' (*GNATI*); 5'-CACCGAACCATGCCTCCTGAGCTCG-3' and 5'-  
484 AAACCGAGCTCAGGAGGCATGGTTC-3' (*GNAT2*); 5'-  
485 CACCGATGCGGGTCAGCGAGTCGA-3' and 5'-AAACTCGACTCGCTGACCCGCATC-3'  
486 (*GNAZ*). Correctly inserted sgRNA-encoding sequences were verified with a Sanger sequencing  
487 (Fasmac, Japan) using a primer 5'-ACTATCATATGCTTACCGTAAC-3'.

488 To achieve successful selection of all-allele-mutant clone, we performed an iterative  
489 CRISPR/ Cas9-mediated mutagenesis. Specifically, in the first round, mutations were introduced  
490 in the *GNAZ* gene. In the second round, the *GNAI2*, the *GNAI3*, and the *GNAOI* genes were  
491 simultaneously mutated. In the last round, the *GNAII*, the *GNATI*, and the *GNAT2* genes were  
492 targeted. Briefly, the HEK293 cells devoid of three Gα families (43) were seeded into a 6 well  
493 culture plate and incubated for one day before transfection. A plasmid encoding sgRNA and  
494 SpCas9-2A-GFP was transfected into the cells using Lipofectamine® 2000 (ThermoFisher)

495 according to a manufacturer's protocol. Three days later, cells were harvested and processed for  
496 isolation of GFP-positive cells (approximately 6% of cells) using a fluorescence-activated cell  
497 sorter (SH800, Sony, Japan). After expansion of clonal cell colonies with a limiting dilution  
498 method, clones were analyzed for mutations in the targeted genes by a restriction enzyme digestion  
499 as described previously (43, 71). PCR primers that amplify the sgRNA-targeting sites were as  
500 following: 5'-AGCTGGTTATTCAGAAGAGGAGTG-3' and 5'-  
501 TGGTCCTGATAGTTGACAAGCC-3' (*GNAI1*); 5'-AAATGGCATGGGAGGGAAGG-3' and  
502 5'-TAAAACCTCAGTGGGGCTGG-3' (*GNAI2*); 5'-AGCTGGCAGTGCTGAAGAAG-3' and 5'-  
503 TCATACAAATGACCAAGGGCTC-3' (*GNAI3*); 5'-GGTCCTTACCGAGCAGGAG-3' and 5'-  
504 CGACATTTTTGTTTCCAGCCC-3' (*GNAO1*); 5'-TAGGTGTGGCTACGGGGTC-3' and 5'-  
505 GCACTCTTCCAGCGAGTACC-3' (*GNATI*); 5'-ACTGCTTCCATCTTAGGTCTTCG-3' and  
506 5'-CATCAACCCACCCTCTCACC-3' (*GNAT2*); 5'-CGAAATCAAGCTGCTCCTGC-3' and  
507 5'-TGTCCTCCAGGTGGTACTCG-3' (*GNAZ*). Candidate clones that harbored restriction  
508 enzyme-resistant PCR fragments were further assessed for their genomic DNA alterations by  
509 direct sequencing or TA cloning as described previously (43, 71).

510

### 511 **Measurement of endothelial barrier function *in vitro***

512 Endothelial barrier function was evaluated by measuring the resistance of a cell-covered  
513 electrode by using an endothelial cell impedance system (ECIS) Z0 device (Applied BioPhysics)  
514 in accordance with the manufacturer's instructions. Briefly, arrays were cleaned with 10 mM L-  
515 cysteine, washed with sterile water, coated with fibronectin for 30 minutes at 37 °C, and incubated  
516 with complete cell culture medium to run electrical stabilization. HUVECs were seeded on a 96  
517 well electrode array (96W10idf) at a density of  $2.5 \times 10^4$  cells/well in the presence or absence of



518 1  $\mu\text{g}/\text{mL}$  doxycycline. On the following, confluent cells were starved for 2–3 hr in EBM-2 (Lonza)  
519 supplemented with 0.5% charcoal treated FBS, then stimulated with AUY954 and/ or LPA.  
520 Resistance was monitored and expressed as fractional resistance, normalizing to the baseline at  
521 time 0.

522

### 523 **Imaging studies in mice**

524 S1PR1-GFP or luciferase signaling mice have been previously described (30, 47).  
525 Bioluminescence image was acquired 2 hr after injection with vehicle (10  $\mu\text{M}$   $\text{Na}_2\text{CO}_3$ , 20% 2-  
526 Hydroxypropyl- $\beta$ -cyclodextrin) through gavage. Three hours after the first imaging for vehicle,  
527 the AM095 (30 mg/kg) was administrated to the mice through gavage and bioluminescence image  
528 was acquired 2 hr after injection. S1PR1-GFP signaling mice were injected with vehicle or AM095  
529 (20 mg/kg, twice a day) for 5 days through gavage to collect lymph nodes.

530

### 531 **Immunofluorescence staining**

532 HUVECs were washed with cold PBS and fixed with 2% paraformaldehyde (PFA) for 10  
533 min at room temperature. U2OS cell were washed with cold PBS and fixed with cold-methanol  
534 for 10 min on ice. Lymph nodes were collected from mice perfused with cold PBS, fixed with 4%  
535 PFA, and then embedded in the OCT compound (Sakura Finetek). Cells and cryosections were  
536 permeabilized in 0.1% Triton X-100 for 20 min and incubated in blocking solution (75 mM sodium  
537 chloride, 18 mM sodium citrate, 1% BSA, 2% FBS, 0.02% sodium azide, and 0.05% Triton X-  
538 100) for 1 hr, followed by incubation with primary antibodies for overnight at 4  $^{\circ}\text{C}$  and with  
539 secondary antibodies for 2 hr at room temperature. Images were visualized by confocal  
540 microscopy using a Zeiss LSM 800. All presented images are 3D reconstructions of z-stack.

541

## 542 **Immunoblot analysis**

543           Cells were washed with cold-PBS and lysed in modified RIPA buffer (50 mM Tris (pH  
544 7.4), 100 mM sodium chloride, 2 mM EDTA, 1% Triton X-100, 0.5% Fos-Choline, and 10 mM  
545 sodium azide) containing phosphatase inhibitors (1 mM sodium orthovanadate, 1 mM sodium  
546 fluoride, and 5 mM  $\beta$ -glycerophosphate) and protease inhibitor cocktail (Sigma). After incubation  
547 on ice for 30 min and a freeze/thaw cycle, protein concentrations in supernatant from  
548 centrifugation at 10,000g, 15 min at 4 °C were determined by bicinchoninic acid assay (Pierce),  
549 and denatured for 30 min at room temperature in Laemmli's sample buffer supplemented with  
550 10%  $\beta$ -mercaptoethanol. An equal amount of proteins were loaded and separated on an SDS-  
551 polyacrylamide gel and transferred electrophoretically to polyvinylidene difluoride membrane  
552 (Millipore). Transferred proteins were then probed with rabbit polyclonal anti-S1PR1 (Santa Cruz  
553 Biotechnology) and HRP-conjugated goat anti-rabbit IgG (Jackson Immuno Research).

554

## 555 **Flow cytometry analysis**

556           U2OS cells, HEK293A cells, and HUVECs were detached with 0.05% Trypsin (Corning),  
557 0.5 mM EDTA, and Accutase (Innovatice Cell Technologies), respectively. The harvested cells  
558 were fixed with 1% PFA for 10 min on ice, and labeled with PE anti-Flag and Alexa Fluor 647  
559 anti-HA antibodies for detecting cell surface expression. The samples were analyzed using BD  
560 Calibur FACS system and FlowJo software was used for data analysis.

561

## 562 **Statistical analysis**

563 Data are expressed as means  $\pm$  SD. Statistical analysis was performed as mentioned using  
564 Prism software (GraphPad). *P* values  $< 0.05$  were considered statistically significant.

565

## 566 **References**

567

- 568 1. Shimizu, T. 2009. Lipid mediators in health and disease: enzymes and receptors as  
569 therapeutic targets for the regulation of immunity and inflammation. *Annu Rev*  
570 *Pharmacol Toxicol.* 49:123-150.
- 571 2. Holthuis, J.C., and A.K. Menon. 2014. Lipid landscapes and pipelines in membrane  
572 homeostasis. *Nature.* 510:48-57.
- 573 3. Hla, T. 2005. Genomic insights into mediator lipidomics. *Prostaglandins Other Lipid*  
574 *Mediat.* 77:197-209.
- 575 4. Blaho, V.A., and T. Hla. 2011. Regulation of mammalian physiology, development, and  
576 disease by the sphingosine 1-phosphate and lysophosphatidic acid receptors. *Chem Rev.*  
577 111:6299-6320.
- 578 5. Mutoh, T., R. Rivera, and J. Chun. 2012. Insights into the pharmacological relevance of  
579 lysophospholipid receptors. *Br J Pharmacol.* 165:829-844.
- 580 6. Moolenaar, W.H., and T. Hla. 2012. SnapShot: Bioactive lysophospholipids. *Cell.*  
581 148:378-378 e372.
- 582 7. Aikawa, S., T. Hashimoto, K. Kano, and J. Aoki. 2015. Lysophosphatidic acid as a lipid  
583 mediator with multiple biological actions. *J Biochem.* 157:81-89.
- 584 8. Proia, R.L., and T. Hla. 2015. Emerging biology of sphingosine-1-phosphate: its role in  
585 pathogenesis and therapy. *J Clin Invest.* 125:1379-1387.
- 586 9. Kobayashi, N., S. Kawasaki-Nishi, M. Otsuka, Y. Hisano, A. Yamaguchi, and T. Nishi.  
587 2018. MFSD2B is a sphingosine 1-phosphate transporter in erythroid cells. *Sci Rep.*  
588 8:4969.
- 589 10. Vu, T.M., A.N. Ishizu, J.C. Foo, X.R. Toh, F. Zhang, D.M. Whee, F. Torta, A. Cazenave-  
590 Gassiot, T. Matsumura, S. Kim, S.E.S. Toh, T. Suda, D.L. Silver, M.R. Wenk, and L.N.  
591 Nguyen. 2017. Mfsd2b is essential for the sphingosine-1-phosphate export in  
592 erythrocytes and platelets. *Nature.* 550:524-528.
- 593 11. Hisano, Y., T. Nishi, and A. Kawahara. 2012. The functional roles of S1P in immunity. *J*  
594 *Biochem.* 152:305-311.
- 595 12. Hall, A. 2012. Rho family GTPases. *Biochem Soc Trans.* 40:1378-1382.
- 596 13. Chun, J., T. Hla, K.R. Lynch, S. Spiegel, and W.H. Moolenaar. 2010. International Union  
597 of Basic and Clinical Pharmacology. LXXVIII. Lysophospholipid receptor nomenclature.  
598 *Pharmacol Rev.* 62:579-587.

- 599 14. Tanaka, M., S. Okudaira, Y. Kishi, R. Ohkawa, S. Iseki, M. Ota, S. Noji, Y. Yatomi, J.  
600 Aoki, and H. Arai. 2006. Autotaxin stabilizes blood vessels and is required for embryonic  
601 vasculature by producing lysophosphatidic acid. *J Biol Chem.* 281:25822-25830.
- 602 15. van Meeteren, L.A., P. Ruurs, C. Stortelers, P. Bouwman, M.A. van Rooijen, J.P.  
603 Pradere, T.R. Pettit, M.J. Wakelam, J.S. Saulnier-Blache, C.L. Mummery, W.H.  
604 Moolenaar, and J. Jonkers. 2006. Autotaxin, a secreted lysophospholipase D, is essential  
605 for blood vessel formation during development. *Mol Cell Biol.* 26:5015-5022.
- 606 16. Mizugishi, K., T. Yamashita, A. Olivera, G.F. Miller, S. Spiegel, and R.L. Proia. 2005.  
607 Essential role for sphingosine kinases in neural and vascular development. *Mol Cell Biol.*  
608 25:11113-11121.
- 609 17. Kono, M., Y. Mi, Y. Liu, T. Sasaki, M.L. Allende, Y.P. Wu, T. Yamashita, and R.L.  
610 Proia. 2004. The sphingosine-1-phosphate receptors S1P1, S1P2, and S1P3 function  
611 coordinately during embryonic angiogenesis. *J Biol Chem.* 279:29367-29373.
- 612 18. Sumida, H., K. Noguchi, Y. Kihara, M. Abe, K. Yanagida, F. Hamano, S. Sato, K.  
613 Tamaki, Y. Morishita, M.R. Kano, C. Iwata, K. Miyazono, K. Sakimura, T. Shimizu, and  
614 S. Ishii. 2010. LPA4 regulates blood and lymphatic vessel formation during mouse  
615 embryogenesis. *Blood.* 116:5060-5070.
- 616 19. Skoura, A., and T. Hla. 2009. Lysophospholipid receptors in vertebrate development,  
617 physiology, and pathology. *J Lipid Res.* 50 Suppl:S293-298.
- 618 20. Zhang, Y., Y.C. Chen, M.F. Krummel, and S.D. Rosen. 2012. Autotaxin through  
619 lysophosphatidic acid stimulates polarization, motility, and transendothelial migration of  
620 naive T cells. *J Immunol.* 189:3914-3924.
- 621 21. Cyster, J.G., and S.R. Schwab. 2012. Sphingosine-1-phosphate and lymphocyte egress  
622 from lymphoid organs. *Annu Rev Immunol.* 30:69-94.
- 623 22. Shea, B.S., and A.M. Tager. 2012. Role of the lysophospholipid mediators  
624 lysophosphatidic acid and sphingosine 1-phosphate in lung fibrosis. *Proc Am Thorac Soc.*  
625 9:102-110.
- 626 23. Nakanaga, K., K. Hama, K. Kano, T. Sato, H. Yukiura, A. Inoue, D. Saigusa, H.  
627 Tokuyama, Y. Tomioka, H. Nishina, A. Kawahara, and J. Aoki. 2014. Overexpression of  
628 autotaxin, a lysophosphatidic acid-producing enzyme, enhances cardia bifida induced by  
629 hypo-sphingosine-1-phosphate signaling in zebrafish embryo. *J Biochem.* 155:235-241.
- 630 24. Bankovich, A.J., L.R. Shiow, and J.G. Cyster. 2010. CD69 suppresses sphingosine 1-  
631 phosphate receptor-1 (S1P1) function through interaction with membrane helix 4. *J Biol*  
632 *Chem.* 285:22328-22337.
- 633 25. Arnon, T.I., Y. Xu, C. Lo, T. Pham, J. An, S. Coughlin, G.W. Dorn, and J.G. Cyster.  
634 2011. GRK2-Dependent S1PR1 Desensitization Is Required for Lymphocytes to  
635 Overcome Their Attraction to Blood. *Science.* 333:1898.
- 636 26. Willinger, T., S.M. Ferguson, J.P. Pereira, P. De Camilli, and R.A. Flavell. 2014.  
637 Dynamin 2-dependent endocytosis is required for sustained S1PR1 signaling. *J Exp Med.*  
638 211:685-700.

- 639 27. Swendeman, S.L., Y. Xiong, A. Cantalupo, H. Yuan, N. Burg, Y. Hisano, A. Cartier,  
640 C.H. Liu, E. Engelbrecht, V. Blaho, Y. Zhang, K. Yanagida, S. Galvani, H. Obinata, J.E.  
641 Salmon, T. Sanchez, A. Di Lorenzo, and T. Hla. 2017. An engineered S1P chaperone  
642 attenuates hypertension and ischemic injury. *Science Signaling*. 10:
- 643 28. Barnea, G., W. Strapps, G. Herrada, Y. Berman, J. Ong, B. Kloss, R. Axel, and K.J. Lee.  
644 2008. The genetic design of signaling cascades to record receptor activation. *Proc Natl*  
645 *Acad Sci U S A*. 105:64-69.
- 646 29. Shalem, O., N.E. Sanjana, and F. Zhang. 2015. High-throughput functional genomics  
647 using CRISPR-Cas9. *Nat Rev Genet*. 16:299-311.
- 648 30. Kono, M., A.E. Tucker, J. Tran, J.B. Bergner, E.M. Turner, and R.L. Proia. 2014.  
649 Sphingosine-1-phosphate receptor 1 reporter mice reveal receptor activation sites in vivo.  
650 *J Clin Invest*. 124:2076-2086.
- 651 31. Shiow, L.R., D.B. Rosen, N. Brdickova, Y. Xu, J. An, L.L. Lanier, J.G. Cyster, and M.  
652 Matloubian. 2006. CD69 acts downstream of interferon-alpha/beta to inhibit S1P1 and  
653 lymphocyte egress from lymphoid organs. *Nature*. 440:540-544.
- 654 32. Konermann, S., M.D. Brigham, A.E. Trevino, J. Joung, O.O. Abudayyeh, C. Barcena,  
655 P.D. Hsu, N. Habib, J.S. Gootenberg, H. Nishimasu, O. Nureki, and F. Zhang. 2015.  
656 Genome-scale transcriptional activation by an engineered CRISPR-Cas9 complex.  
657 *Nature*. 517:583-588.
- 658 33. Kawahara, A., T. Nishi, Y. Hisano, H. Fukui, A. Yamaguchi, and N. Mochizuki. 2009.  
659 The Sphingolipid Transporter Spns2 Functions in Migration of Zebrafish Myocardial  
660 Precursors. *Science*. 323:524-527.
- 661 34. Hisano, Y., S. Ota, S. Takada, and A. Kawahara. 2013. Functional cooperation of spns2  
662 and fibronectin in cardiac and lower jaw development. *Biol Open*. 2:789-794.
- 663 35. Dixon, A.S., M.K. Schwinn, M.P. Hall, K. Zimmerman, P. Otto, T.H. Lubben, B.L.  
664 Butler, B.F. Binkowski, T. Machleidt, T.A. Kirkland, M.G. Wood, C.T. Eggers, L.P.  
665 Encell, and K.V. Wood. 2016. NanoLuc Complementation Reporter Optimized for  
666 Accurate Measurement of Protein Interactions in Cells. *ACS Chem Biol*. 11:400-408.
- 667 36. Lee, M.-J., S. Thangada, C.H. Liu, B.D. Thompson, and T. Hla. 1998. Lysophosphatidic  
668 Acid Stimulates the G-protein-coupled Receptor EDG-1 as a Low Affinity Agonist.  
669 *Journal of Biological Chemistry*. 273:22105-22112.
- 670 37. Liu, C.H., S. Thangada, M.-J. Lee, J.R. Van Brocklyn, S. Spiegel, T. Hla, and G.  
671 Guidotti. 1999. Ligand-induced Trafficking of the Sphingosine-1-phosphate Receptor  
672 EDG-1. *Molecular Biology of the Cell*. 10:1179-1190.
- 673 38. <2003\_Ki16425.pdf>.
- 674 39. Fukushima, N., Y. Kimura, and J. Chun. 1998. A single receptor encoded by vzg-  
675 1/lpa1/edg-2 couples to G proteins and mediates multiple cellular responses to  
676 lysophosphatidic acid. *Proceedings of the National Academy of Sciences*. 95:6151-6156.
- 677 40. Ishii, I., J.J.A. Contos, N. Fukushima, and J. Chun. 2000. Functional Comparisons of the  
678 Lysophosphatidic Acid Receptors, LPA1/VZG-1/EDG-2, LPA2/EDG-4, and

- 679 LPA3/EDG-7 in Neuronal Cell Lines Using a Retrovirus Expression System. *Molecular*  
680 *Pharmacology*. 58:895.
- 681 41. Lee, M.-J., J.R. Van Brocklyn, S. Thangada, C.H. Liu, A.R. Hand, R. Menzeleev, S.  
682 Spiegel, and T. Hla. 1998. Sphingosine-1-Phosphate as a Ligand for the G Protein-  
683 Coupled Receptor EDG-1. *Science*. 279:1552.
- 684 42. Windh, R.T., M.-J. Lee, T. Hla, S. An, A.J. Barr, and D.R. Manning. 1999. Differential  
685 Coupling of the Sphingosine 1-Phosphate Receptors Edg-1, Edg-3, and H218/Edg-5 to  
686 the Gi, Gq, and G12 Families of Heterotrimeric G Proteins. *Journal of Biological*  
687 *Chemistry*. 274:27351-27358.
- 688 43. Grundmann, M., N. Merten, D. Malfacini, A. Inoue, P. Preis, K. Simon, N. Ruttiger, N.  
689 Ziegler, T. Benkel, N.K. Schmitt, S. Ishida, I. Muller, R. Reher, K. Kawakami, A. Inoue,  
690 U. Rick, T. Kuhl, D. Imhof, J. Aoki, G.M. Konig, C. Hoffmann, J. Gomeza, J. Wess, and  
691 E. Kostenis. 2018. Lack of beta-arrestin signaling in the absence of active G proteins. *Nat*  
692 *Commun*. 9:341.
- 693 44. Ranjan, R., H. Dwivedi, M. Baidya, M. Kumar, and A.K. Shukla. 2017. Novel Structural  
694 Insights into GPCR-beta-Arrestin Interaction and Signaling. *Trends Cell Biol*. 27:851-  
695 862.
- 696 45. Tian, X., D.S. Kang, and J.L. Benovic. 2014. beta-arrestins and G protein-coupled  
697 receptor trafficking. *Handb Exp Pharmacol*. 219:173-186.
- 698 46. Pan, S., Y. Mi, C. Pally, C. Beerli, A. Chen, D. Guerini, K. Hinterding, B. Nuesslein-  
699 Hildesheim, T. Tuntland, S. Lefebvre, Y. Liu, W. Gao, A. Chu, V. Brinkmann, C. Bruns,  
700 M. Streiff, C. Cannet, N. Cooke, and N. Gray. 2006. A monoselective sphingosine-1-  
701 phosphate receptor-1 agonist prevents allograft rejection in a stringent rat heart  
702 transplantation model. *Chem Biol*. 13:1227-1234.
- 703 47. Kono, M., E.G. Conlon, S.Y. Lux, K. Yanagida, T. Hla, and R.L. Proia. 2017.  
704 Bioluminescence imaging of G protein-coupled receptor activation in living mice. *Nat*  
705 *Commun*. 8:1163.
- 706 48. Swaney, J.S., C. Chapman, L.D. Correa, K.J. Stebbins, A.R. Broadhead, G. Bain, A.M.  
707 Santini, J. Darlington, C.D. King, C.S. Baccei, C. Lee, T.A. Parr, J.R. Roppe, T.J.  
708 Seiders, J. Ziff, P. Prasit, J.H. Hutchinson, J.F. Evans, and D.S. Lorrain. 2011.  
709 Pharmacokinetic and pharmacodynamic characterization of an oral lysophosphatidic acid  
710 type 1 receptor-selective antagonist. *J Pharmacol Exp Ther*. 336:693-700.
- 711 49. Heng, T.S.P., M.W. Painter, C. The Immunological Genome Project, K. Elpek, V.  
712 Lukacs-Kornek, N. Mauermann, S.J. Turley, D. Koller, F.S. Kim, A.J. Wagers, N.  
713 Asinovski, S. Davis, M. Fassett, M. Feuerer, D.H.D. Gray, S. Haxhinasto, J.A. Hill, G.  
714 Hyatt, C. Laplace, K. Leatherbee, D. Mathis, C. Benoist, R. Jianu, D.H. Laidlaw, J.A.  
715 Best, J. Knell, A.W. Goldrath, J. Jarjoura, J.C. Sun, Y. Zhu, L.L. Lanier, A. Ergun, Z. Li,  
716 J.J. Collins, S.A. Shinton, R.R. Hardy, R. Friedline, K. Sylvia, and J. Kang. 2008. The  
717 Immunological Genome Project: networks of gene expression in immune cells. *Nature*  
718 *Immunology*. 9:1091.
- 719 50. Randolph, G.J., S. Ivanov, B.H. Zinselmeyer, and J.P. Scallan. 2017. The Lymphatic  
720 System: Integral Roles in Immunity. *Annual Review of Immunology*. 35:31-52.

- 721 51. Baluk, P., J. Fuxe, H. Hashizume, T. Romano, E. Lashnits, S. Butz, D. Vestweber, M.  
722 Corada, C. Molendini, E. Dejana, and D.M. McDonald. 2007. Functionally specialized  
723 junctions between endothelial cells of lymphatic vessels. *J Exp Med.* 204:2349-2362.
- 724 52. Lee, M.-J., S. Thangada, K.P. Claffey, N. Ancellin, C.H. Liu, M. Kluk, M. Volpi, R.I.  
725 Sha'afi, and T. Hla. 1999. Vascular Endothelial Cell Adherens Junction Assembly and  
726 Morphogenesis Induced by Sphingosine-1-Phosphate. *Cell.* 99:301-312.
- 727 53. Stolwijk, J.A., K. Matrougui, C.W. Renken, and M. Trebak. 2015. Impedance analysis of  
728 GPCR-mediated changes in endothelial barrier function: overview and fundamental  
729 considerations for stable and reproducible measurements. *Pflugers Arch.* 467:2193-2218.
- 730 54. Knipe, R.S., A.M. Tager, and J.K. Liao. 2015. The Rho kinases: critical mediators of  
731 multiple profibrotic processes and rational targets for new therapies for pulmonary  
732 fibrosis. *Pharmacol Rev.* 67:103-117.
- 733 55. Komarova, Y.A., K. Kruse, D. Mehta, and A.B. Malik. 2017. Protein Interactions at  
734 Endothelial Junctions and Signaling Mechanisms Regulating Endothelial Permeability.  
735 *Circ Res.* 120:179-206.
- 736 56. Oo, M.L., S.H. Chang, S. Thangada, M.T. Wu, K. Rezaul, V. Blaho, S.I. Hwang, D.K.  
737 Han, and T. Hla. 2011. Engagement of S1P(1)-degradative mechanisms leads to vascular  
738 leak in mice. *J Clin Invest.* 121:2290-2300.
- 739 57. Lee, M.-J., M. Evans, and T. Hla. 1996. The Inducible G Protein-coupled Receptor edg-1  
740 Signals via the G/Mitogen-activated Protein Kinase Pathway. *Journal of Biological*  
741 *Chemistry.* 271:11272-11279.
- 742 58. Grigorova, I.L., S.R. Schwab, T.G. Phan, T.H. Pham, T. Okada, and J.G. Cyster. 2009.  
743 Cortical sinus probing, S1P1-dependent entry and flow-based capture of egressing T  
744 cells. *Nat Immunol.* 10:58-65.
- 745 59. Mendoza, A., B. Breart, W.D. Ramos-Perez, L.A. Pitt, M. Gobert, M. Sunkara, J.J.  
746 Lafaille, A.J. Morris, and S.R. Schwab. 2012. The transporter Spns2 is required for  
747 secretion of lymph but not plasma sphingosine-1-phosphate. *Cell Rep.* 2:1104-1110.
- 748 60. Hisano, Y., N. Kobayashi, A. Yamaguchi, and T. Nishi. 2012. Mouse SPNS2 functions  
749 as a sphingosine-1-phosphate transporter in vascular endothelial cells. *PLoS One.*  
750 7:e38941.
- 751 61. Pham, T.H., P. Baluk, Y. Xu, I. Grigorova, A.J. Bankovich, R. Pappu, S.R. Coughlin,  
752 D.M. McDonald, S.R. Schwab, and J.G. Cyster. 2010. Lymphatic endothelial cell  
753 sphingosine kinase activity is required for lymphocyte egress and lymphatic patterning. *J*  
754 *Exp Med.* 207:17-27.
- 755 62. Nakasaki, T., T. Tanaka, S. Okudaira, M. Hirose, E. Umemoto, K. Otani, S. Jin, Z.  
756 Bai, H. Hayasaka, Y. Fukui, K. Aozasa, N. Fujita, T. Tsuruo, K. Ozono, J. Aoki, and M.  
757 Miyasaka. 2008. Involvement of the lysophosphatidic acid-generating enzyme autotaxin  
758 in lymphocyte-endothelial cell interactions. *Am J Pathol.* 173:1566-1576.
- 759 63. Bai, Z., L. Cai, E. Umemoto, A. Takeda, K. Tohya, Y. Komai, P.T. Veeraveedu, E. Hata,  
760 Y. Sugiura, A. Kubo, M. Suematsu, H. Hayasaka, S. Okudaira, J. Aoki, T. Tanaka, H.M.  
761 Albers, H. Ovaa, and M. Miyasaka. 2013. Constitutive lymphocyte transmigration across

- 762 the basal lamina of high endothelial venules is regulated by the  
763 autotaxin/lysophosphatidic acid axis. *J Immunol.* 190:2036-2048.
- 764 64. Burg, N., S. Swendeman, S. Worgall, T. Hla, and J.E. Salmon. 2018. Sphingosine -1  
765 Phosphate Receptor-1 signaling maintains endothelial cell barrier function and protects  
766 against immune complex-induced vascular injury. *Arthritis & rheumatology (Hoboken,  
767 N.J.)*.
- 768 65. Zhang, F., G. Zarkada, J. Han, J. Li, A. Dubrac, R. Ola, G. Genet, K. Boyé, P. Michon,  
769 S.E. Künzel, J.P. Camporez, A.K. Singh, G.-H. Fong, M. Simons, P. Tso, C. Fernández-  
770 Hernando, G.I. Shulman, W.C. Sessa, and A. Eichmann. 2018. Lacteal junction zippering  
771 protects against diet-induced obesity. *Science.* 361:599.
- 772 66. Petreanu, L., D. Huber, A. Sobczyk, and K. Svoboda. 2007. Channelrhodopsin-2–assisted  
773 circuit mapping of long-range callosal projections. *Nature Neuroscience.* 10:663.
- 774 67. Joung, J., S. Konermann, J.S. Gootenberg, O.O. Abudayyeh, R.J. Platt, M.D. Brigham,  
775 N.E. Sanjana, and F. Zhang. 2017. Genome-scale CRISPR-Cas9 knockout and  
776 transcriptional activation screening. *Nat Protoc.* 12:828-863.
- 777 68. Li, W., H. Xu, T. Xiao, L. Cong, M.I. Love, F. Zhang, R.A. Irizarry, J.S. Liu, M. Brown,  
778 and X.S. Liu. 2014. MAGeCK enables robust identification of essential genes from  
779 genome-scale CRISPR/Cas9 knockout screens. *Genome Biology.* 15:554.
- 780 69. Inoue, A. Illuminating G protein coupling selectivity of GPCRs. submitted:
- 781 70. Ran, F.A., P.D. Hsu, J. Wright, V. Agarwala, D.A. Scott, and F. Zhang. 2013. Genome  
782 engineering using the CRISPR-Cas9 system. *Nat Protoc.* 8:2281-2308.
- 783 71. O’Hayre, M., K. Eichel, S. Avino, X. Zhao, D.J. Steffen, X. Feng, K. Kawakami, J. Aoki,  
784 K. Messer, R. Sunahara, A. Inoue, M. von Zastrow, and J.S. Gutkind. 2017. Genetic  
785 evidence that  $\beta$ -arrestins are dispensable for the initiation of  $\beta$ -adrenergic receptor  
786 signaling to ERK. *Science Signaling.* 10:
- 787 72. Atwood, B.K., J. Lopez, J. Wager-Miller, K. Mackie, and A. Straiker. 2011. Expression  
788 of G protein-coupled receptors and related proteins in HEK293, AtT20, BV2, and N18  
789 cell lines as revealed by microarray analysis. *BMC Genomics.* 12:14.
- 790 73. Tan, K.W., K.P. Yeo, F.H. Wong, H.Y. Lim, K.L. Khoo, J.P. Abastado, and V. Angeli.  
791 2012. Expansion of cortical and medullary sinuses restrains lymph node hypertrophy  
792 during prolonged inflammation. *J Immunol.* 188:4065-4080.

793  
794



795 **Figure legends**

796 **Figure 1. Unbiased whole genome-wide search for S1PR1 modulators**

797 (A) Schematic of S1PR1 modulator screening system. Four lentiviral vectors were transduced into  
798 U2OS cell line to enable gene activation by SAM and monitoring S1PR1 activation by TANGO  
799 system. The cells introduced with SAM sgRNA library were starved with 0.5% charcoal treated  
800 FBS, then the Venus-positive population was sorted and next-gen sequence (NGS) analysis was  
801 carried out to identify the enriched SAM sgRNA sequences.

802 (B) Scatter plot showing enrichment of sgRNAs after sorting. Most sgRNAs are equally  
803 distributed in the pre-sort sample (closed gray circles) while after sorting a small fraction of  
804 sgRNAs (2,770 out of 70,290 sgRNAs) were enriched and others were not detected (open blue  
805 circles). The y-axis shows the NGS reads of sgRNAs.

806 (C) Identification of top candidate genes using the MAGeCK method (68). The names of top ten  
807 candidate genes are indicated.

808

809 **Figure 2. Activated LPAR1 induces S1PR1/  $\beta$ -arrestin coupling**

810 (A) Schematic of NanoBiT system to measure S1PR1 and  $\beta$ -arrestin1 interaction. SmBiT and  
811 LgBiT were fused to C-terminal of S1PR1 and N-terminal of  $\beta$ -arrestin, respectively. S1PR1 and  
812  $\beta$ -arrestin1 coupling can be detected as luminescence signal emitted by complementation of  
813 SmBiT and LgBiT.

814 (B) S1PR1-SmBiT or S1PR1(R120A)-SmBiT was transfected with LgBiT- $\beta$ -arrestin1, and  
815 luminescence was measured at 15–20 min after S1P stimulation.

816 (C) LPAR1 or empty vector was transfected with S1PR1-SmBiT and LgBiT- $\beta$ -arrestin1, and  
817 luminescence was measured at 15–20 min after LPA stimulation.

818 **(D, E)** The cells were incubated with 1  $\mu$ M Ki16425 or W146 for 30 min prior to stimulation, and  
819 luminescence was measured at 15–20 min after LPA (D) or S1P (E) stimulation.

820 **(F)** LPAR1 or empty vector was transfected with S1PR1(R120A)-SmBiT and LgBiT- $\beta$ -arrestin1,  
821 and luminescence was measured at 15–20 min after LPA stimulation.

822  $n = 3$ –8 independent experiments; expressed as mean  $\pm$  SD.

823

### 824 **Figure 3. LPAR1-mediated S1PR1/ $\beta$ -arrestin coupling in G protein deficient cells**

825 LPAR1 or empty vector was transfected with S1PR1-SmBiT and LgBiT- $\beta$ -arrestin1 into HEK293  
826 full $\Delta$ G $\alpha$  cells lacking all G protein alpha subunits. Luminescence was measured at 15–20 min  
827 after S1P (A) or LPA (B) stimulation.  $n = 3$  independent experiments; expressed as mean  $\pm$  SD.

828

### 829 **Figure 4. C-terminal of LPAR1 and TM4 of S1PR1 is important for LPAR1-induced inter- 830 GPCR $\beta$ -arrestin coupling**

831 **(A)** LPAR1-SmBiT or LPAR1 $\Delta$ C-SmBiT was transfected with LgBiT- $\beta$ -arrestin1, and  
832 luminescence was measured at 15–20 min after LPA stimulation.

833 **(B)** G-protein dissociation assay was carried out by transfecting LgBiT-GNAI2, GNB1, and  
834 SmBiT-GNGT1 plasmids with LPAR1 or LPAR1 $\Delta$ C. Luminescence was measured at 6–9 min  
835 after LPA stimulation.

836 **(C)** LPAR1 or LPAR1 $\Delta$ C was transfected with S1PR1-SmBiT and LgBiT- $\beta$ -arrestin1, and  
837 luminescence was measured at 15–20 min after LPA stimulation.

838 **(D)** S1PR1-SmBiT or S1PR1(TM4)-SmBiT was transfected with LgBiT- $\beta$ -arrestin1, and  
839 luminescence was measured at 15–20 min after S1P stimulation.

840 (E) LPAR1 or empty vector was transfected with S1PR1-SmBiT or S1PR1(TM4)-SmBiT and  
841 LgBiT- $\beta$ -arrestin1, and luminescence was measured at 15–20 min after LPA stimulation.  
842  $n = 3$ –5 independent experiments; expressed as mean  $\pm$  SD.  $P$  values were determined by two-  
843 way ANOVA followed by Sidak’s multiple comparisons test comparing “S1PR1(TM4)-SmBiT +  
844 LPAR1” to “S1PR1-SmBiT + LPAR1”; \* $P = 0.0018$ , \*\* $P \leq 0.001$ .

845

### 846 **Figure 5. LPAR1 blocks S1PR1/ G protein pathway**

847 (A) Flow cytometric analysis showing surface Flag-S1PR1 expression after stimulation with 1  $\mu$ M  
848 S1P (blue line) or LPA (orange line) for 1 hr or without stimulation (gray) in HEK293A cells stably  
849 expressing Flag-S1PR1 and LPAR1.

850 (B) S1PR1 and LPAR1, LPAR2, or LPAR5 were transfected with LgBiT-GNAO1, GNB1, and  
851 SmBiT-GNGT1 plasmids. Luminescence was measured at 6–9 min after AUY954 stimulation.  $n$   
852 = 3–7 independent experiments; expressed as mean  $\pm$  SD.  $P$  values were determined by two-way  
853 ANOVA followed by Sidak’s multiple comparisons test comparing “S1PR1 + LPAR1” to S1PR1  
854 alone; \* $P \leq 0.01$ , \*\* $P \leq 0.0001$ .

855 (C) Flow cytometric analysis of HEK293A cells transfected with LPAR1 (orange), LPAR2 (brown  
856 line), LPAR3 (dark green line) tagged with Flag at N-terminal, or empty vector (gray).

857

### 858 **Figure 6. Endogenous LPAR1-induced inter-GPCR $\beta$ -arrestin coupling *in vivo***

859 (A) MEF cells isolated from S1PR1 luciferase signaling mice were added with luciferin, then  
860 stimulated with LPA at various concentration in the presence or absence of 1  $\mu$ M Ki16425.  
861 Luminescence was measured at 8–12 min after LPA stimulation.  $n = 4$  independent experiments;

862 expressed as mean  $\pm$  SD. *P* values were determined by two-way ANOVA followed by Sidak's  
863 multiple comparisons test comparing vehicle to Ki16425; \**P* = 0.0104, \*\**P* = 0.0021.

864 (B) LPAR1 was transfected with S1PR1-SmBiT and LgBiT- $\beta$ -arrestin1. The cells were incubated  
865 with 1  $\mu$ M AM095 for 30 min prior to stimulation, and luminescence was measured at 15–20 min  
866 after LPA stimulation.

867 (C,D) Representative bioluminescence images of mice comparing the effects of vehicle (B) or  
868 AM095 (30 mg/kg, C), 2 hr after gavage.

869 (E) The bioluminescence activity was quantified by determining the total flux (photons/sec; p/s).  
870 *n* = 9 for each group; expressed as mean  $\pm$  SD. *P* value was determined by paired t test.

871 (F–H) Mice were subjected to imaging prior to administration (E), then dissected in order to image  
872 internal organs after vehicle (F) or AM095 (30 mg/kg, G) administration. Arrow, lymph node; Sp,  
873 spleen; Lu, lung.

874

### 875 **Figure 7. S1PR1/ $\beta$ -arrestin coupling in LPAR1 antagonist-treated lymph node**

876 (A–E) Brachial lymph node sections from S1PR1-GFP signaling mice treated with vehicle or  
877 AM095 were stained with B220 (red, B cell), CD8a (blue, T cell), and VEGFR3 (white, LEC) (A),  
878 B220 (blue), CD11c (red, dendritic cell), and LYVE1 (white, LEC) (B,C), or CD169 (red,  
879 macrophage), and LYVE1 (white) (D,E). LYVE1<sup>+</sup> lymphatics were identified as subcapsular  
880 sinuses if they were found in subcapsular space and contained B cells and dendritic cells.  
881 Medullary sinuses contain CD169<sup>+</sup> macrophages, and cortical sinuses are macrophage free (73).

882 (F) Mesenteric lymph node section was stained with VE-Cadherin (red), PECAM-1 (green), and  
883 ERG (blue). The punctate and continuous junctions were indicated with arrowheads and asterisks,  
884 respectively. Bars in (A), (a,b,B–E), and, (F) are 200  $\mu$ m, 20  $\mu$ m, and 10  $\mu$ m, respectively.

885

886 **Figure 8. LPA/ LPAR1 attenuates S1PR1-mediated barrier function**

887 (A–D) HUVECs were analyzed for barrier function by real-time measurement of TEER in the  
888 absence (A, B) or presence (C, D) of doxycycline (Dox), which can induce LPAR1 expression by  
889 Tet-On system. One day after seeding, the cells were starved with 0.5% charcoal-treated FBS in  
890 the absence (A, C) or presence (B, D) of 1  $\mu$ M Ki16425. At time 0, 100 nM AUY954 (blue), LPA  
891 (orange), AUY954 with LPA (dark green), or vehicle (black) was added.  $n = 3$  independent  
892 experiments; expressed as mean  $\pm$  SD.  $P$  values were determined by two-way ANOVA followed  
893 by Sidak’s multiple comparisons test comparing “AUY954 + LPA” to AUY954 alone;  $*P \leq 0.0001$ .  
894 (E–H) HUVECs expressing LPAR1 were starved with 0.5% charcoal treated FBS for 2 hr, then  
895 treated with 100 nM AUY954 and/ or LPA for 30 min. Cells were fixed and stained for VE-  
896 Cadherin (red) and p-MLC (green). F-actin and nuclei were stained with phalloidin (white) and  
897 DAPI (4’,6-diamidino-2-phenylindole, blue), respectively. Arrowheads indicate intercellular gaps.  
898 Bars, 20  $\mu$ m.

899

900 **Figures**

Figure 1

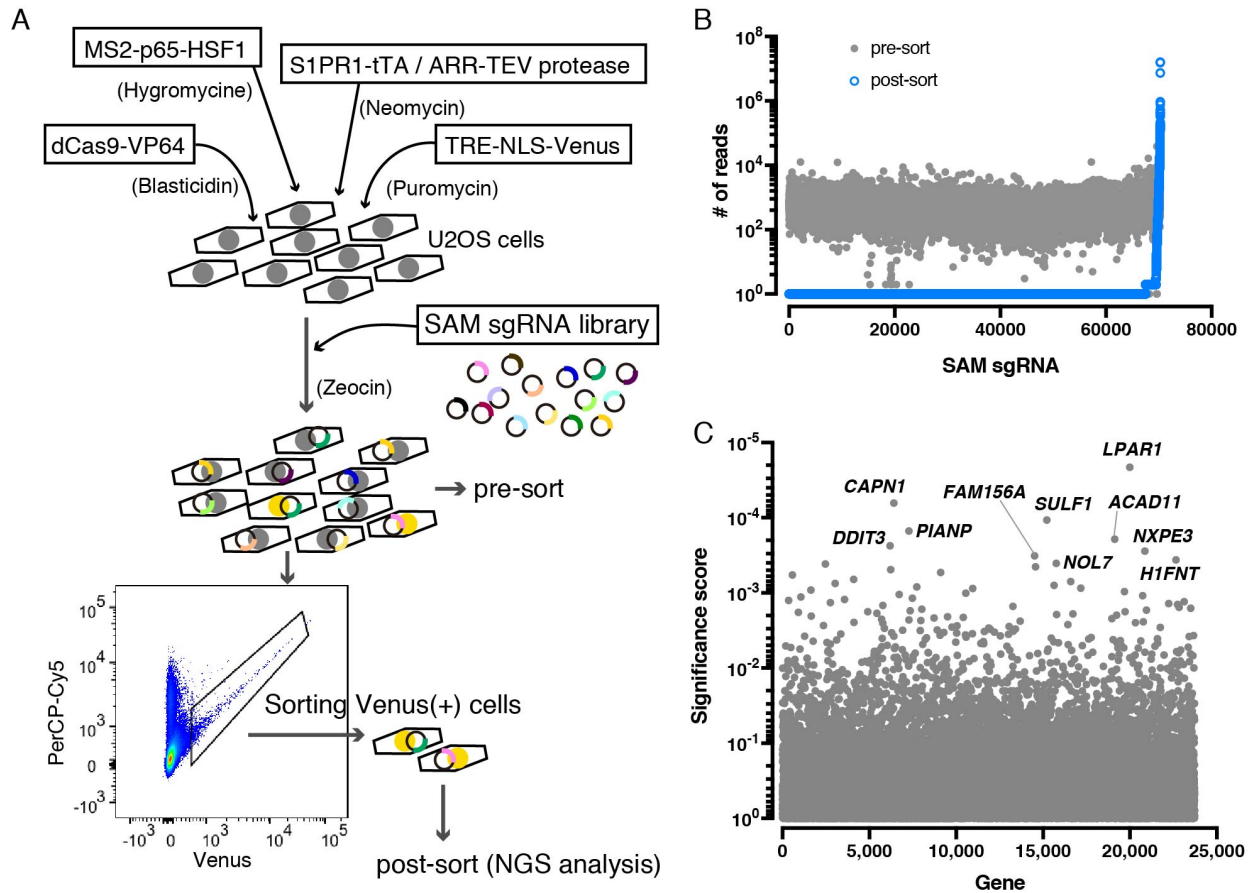

901

902

Figure 2

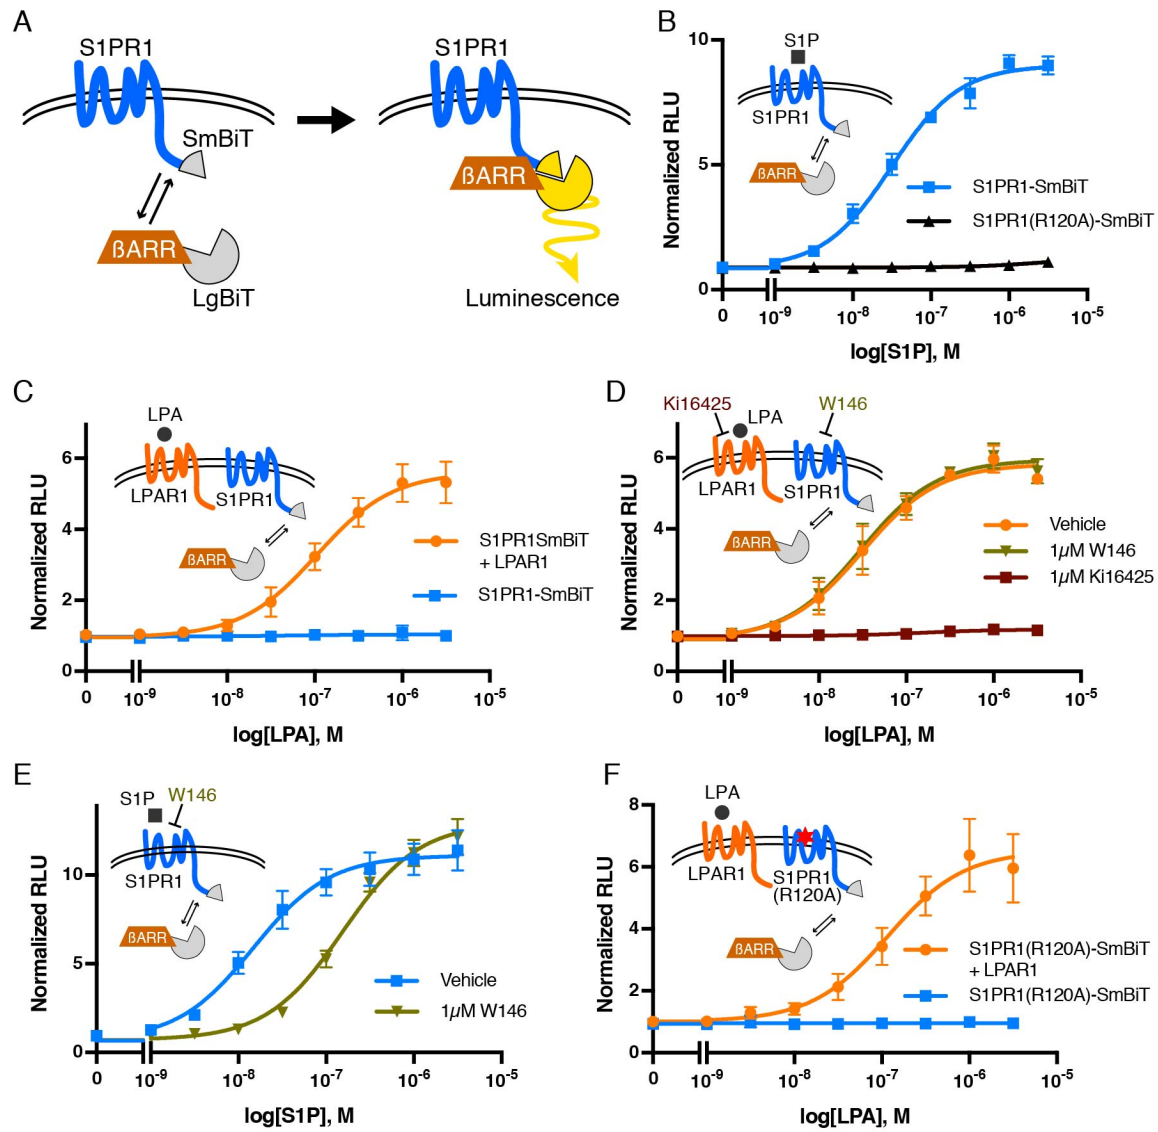

903

904

Figure 3

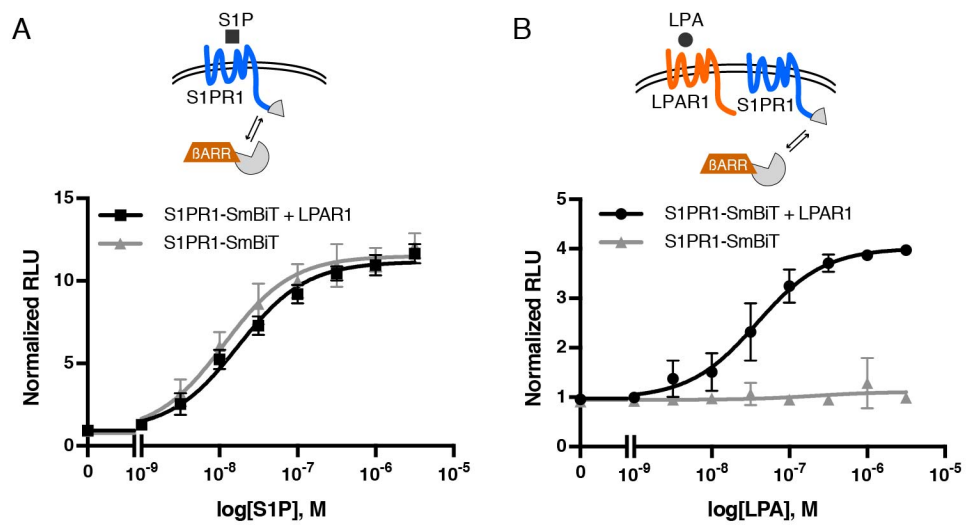

905

906



Figure 4

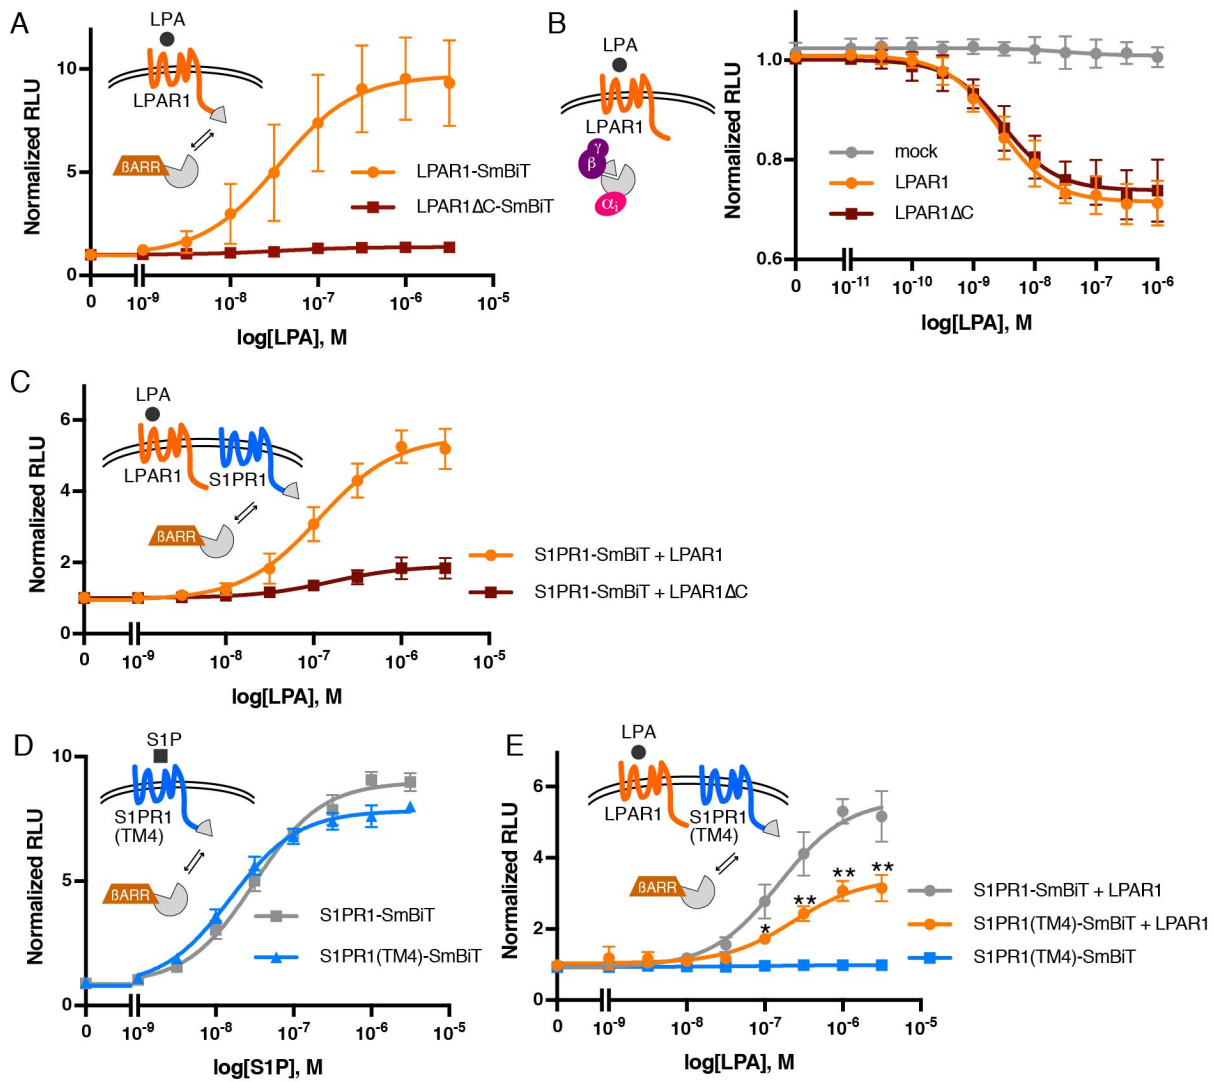

907

908

Figure 5

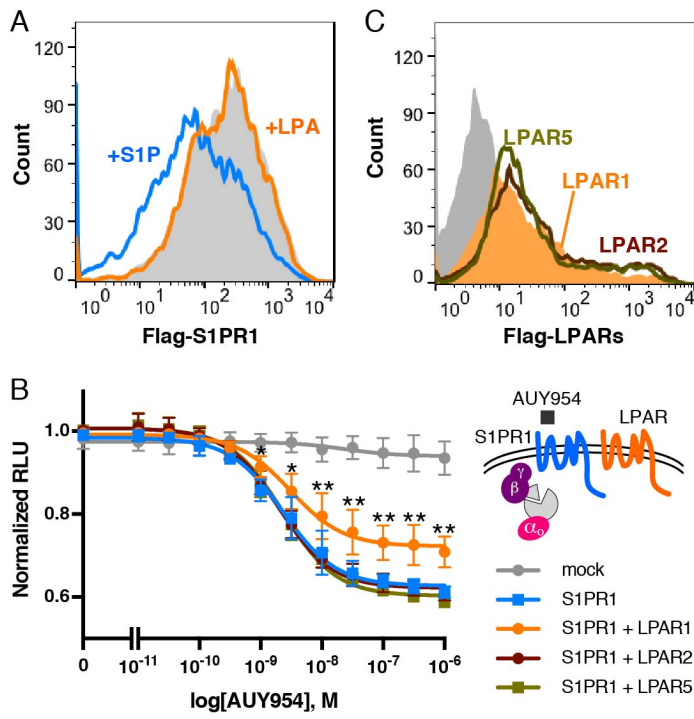

909

910

Figure 6

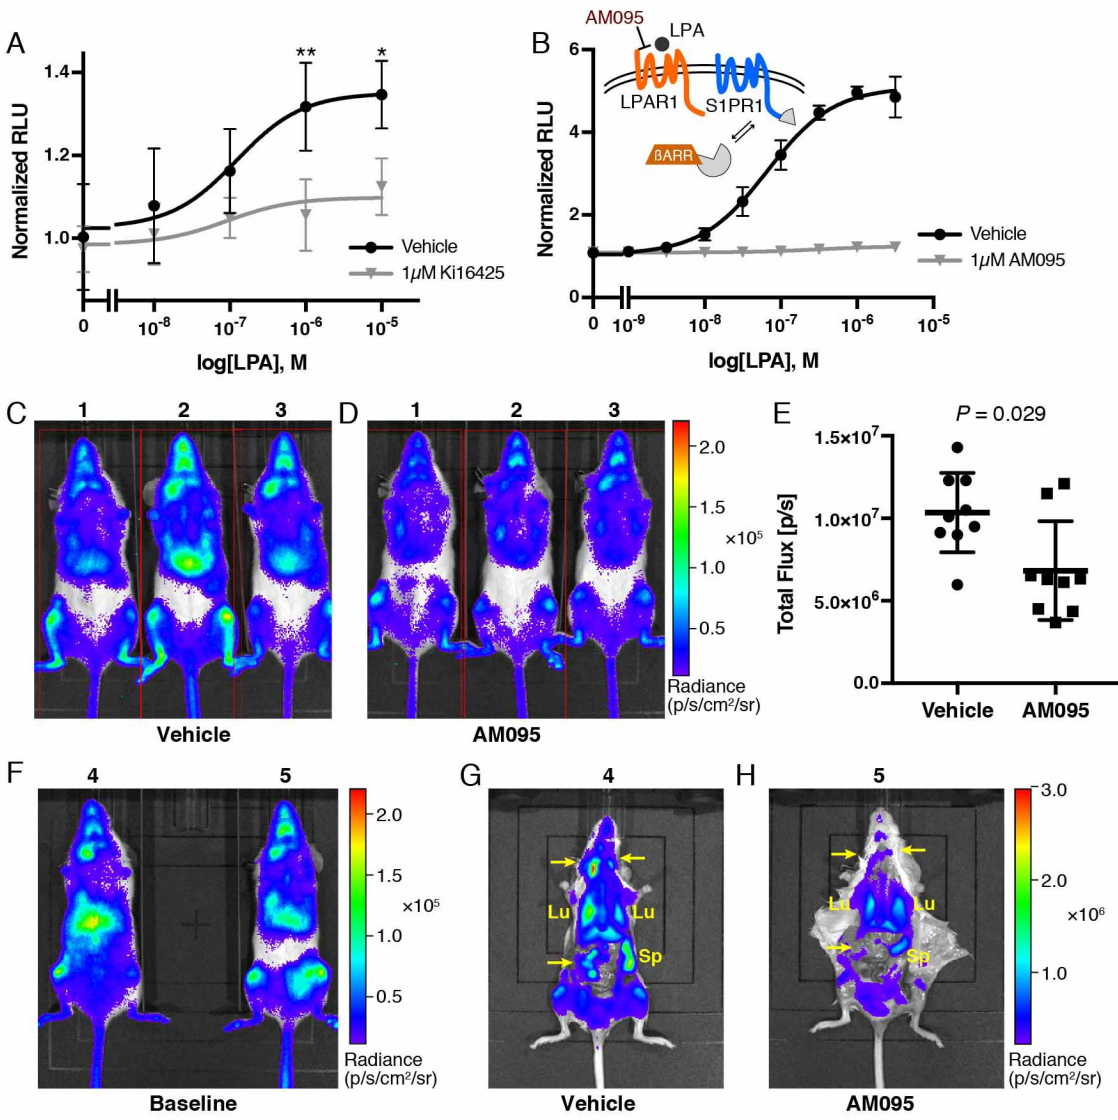

911

912

Figure 7

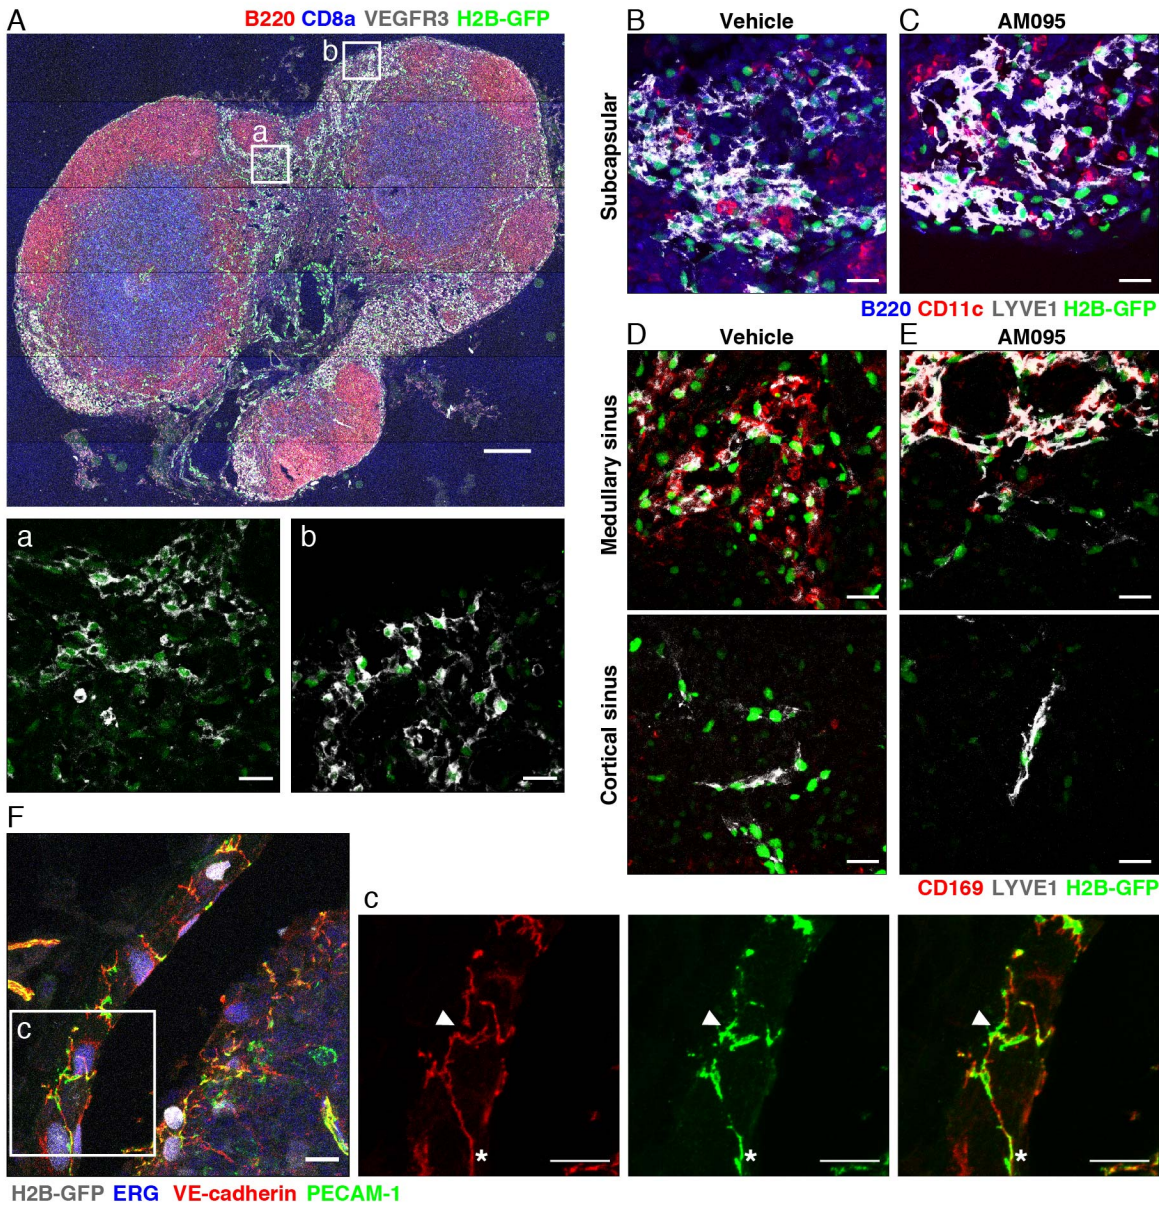

913

914

Figure 8

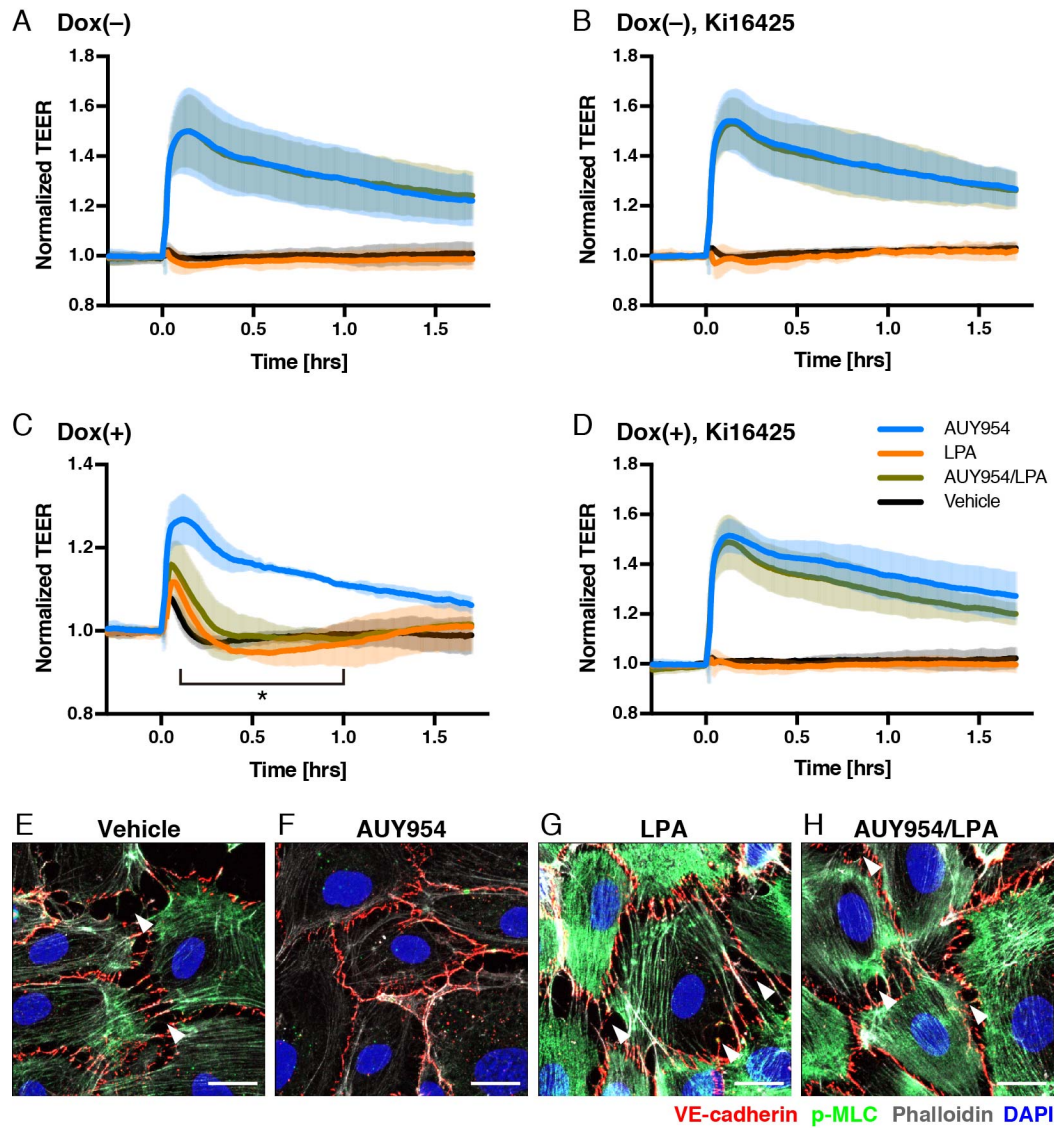

915

916

917

918

919

920

921

922

923 **Acknowledgments**

924           The authors thank Drs. Hiroko Kishikawa, Yuji Shinjo, and Kumiko Makide for technical  
925 assistance of FACS. The SAM sgRNA library, dCas9-VP64, MS2-P65-HSF, and pSpCas9(BB)-  
926 2A-GFP (PX458) plasmids were provided by Professor Feng Zhang (Broad Institute of Harvard  
927 and MIT). The pCAGGS-ChR2-Venus plasmid was provided by Karel Svoboda.

928

929 **Funding:** This work was supported by NIH grant R35 HL135821 (TH), Fondation Leducq  
930 transatlantic network grant (SphingoNet)(TH), Intramural program of the NIDDK, NIH (MK,  
931 RLP), postdoctoral fellowships from the American Heart Association (AC, AK), JSPS KAKENHI  
932 grant 17K08264 (A.I.); the PRIME JP17gm5910013 (A.I.) and the LEAP JP17gm0010004 (A.I.  
933 and J.A.) from the Japan Agency for Medical Research and Development (AMED). Y.H. and K.Y.  
934 were supported in part by postdoctoral fellowships from the Japan Society for the Promotion of  
935 Science Overseas Research Fellowships. Y.H. was also supported by the Uehara Memorial  
936 Foundation.

937

938 **Competing interests:** The authors declare that they have no competing interests.
